# Genetic Analyses of Epigenetic Predictors that Estimate Aging, Metabolic Traits, and Lifespan

Khyobeni Mozhui<sup>1,2\*</sup>, Ake T. Lu<sup>3</sup>, Caesar Z Li<sup>3</sup>, Amin Haghani<sup>4</sup>, Jose Vladimir Sandoval-Sierra<sup>1</sup>, Robert W. Williams<sup>2</sup>, Steve Horvath<sup>3,4</sup>

<sup>1</sup> Department of Preventive Medicine, University of Tennessee Health Science Center, College of Medicine, Memphis, Tennessee, USA

<sup>2</sup> Department of Genetics, Genomics and Informatics, University of Tennessee Health Science Center, College of Medicine, Memphis, Tennessee, USA

<sup>3</sup> Department of Human Genetics, David Geffen School of Medicine, University of California Los Angeles, Los Angeles, CA, USA

<sup>4</sup> Department of Biostatistics, Fielding School of Public Health, University of California Los Angeles, Los Angeles, CA, USA

\*Correspondence:

Khyobeni Mozhui

[kmozhui@uthsc.edu](mailto:kmozhui@uthsc.edu)

## 18 **Abstract**

19 DNA methylation (DNAm) clocks are accurate molecular biomarkers of aging. However, the  
20 clock mechanisms remain unclear. Here, we used a pan-mammalian microarray to assay DNAm  
21 in liver from 339 predominantly female mice belonging to the BXD family. We computed  
22 epigenetic clocks and maximum lifespan predictor (predicted-maxLS), and examined  
23 associations with DNAm entropy, diet, weight, metabolic traits, and genetic variation. The  
24 epigenetic age acceleration (EAA) derived from the clocks, and predicted-maxLS were  
25 correlated with lifespan of the BXD strains. Quantitative trait locus (QTL) analyses uncovered  
26 significant QTLs on chromosome (Chr) 11 that encompasses the *ErbB2/Her2* oncogenic region,  
27 and on Chr19 that contains a cytochrome P450 cluster. Both loci harbor candidate genes  
28 associated with EAA in humans (*STXBP4*, *NKX2-3*, *CUTC*). Transcriptome and proteome analyses  
29 revealed enrichment in oxidation-reduction, metabolic, and mitotic genes. Our results highlight  
30 loci that are concordant in human and mouse, and demonstrate intimate links between  
31 metabolism, body weight, and epigenetic aging.

32

33

34 **Keywords:** epigenetic clock, lifespan, aging, DNA methylation, QTL, weight, diet

## 35 Introduction

36 Epigenetic clocks are widely used molecular biomarkers of aging<sup>1</sup>. These biological clocks are  
37 based on the methylation status across an ensemble of “clock CpGs” that are collectively used  
38 to derive a DNA methylation (DNAm) based estimate of age (DNAmAge). This estimate tracks  
39 closely, but not perfectly, with an individual’s chronological age. How much the DNAmAge  
40 deviates from the known chronological age is a measure of the rate of biological aging. Denoted  
41 as epigenetic age acceleration (EAA), a more accelerated measure (positive EAA) suggests an  
42 older biological age. While DNAmAge predicts age, its age-adjusted counterpart, EAA, is  
43 associated with health, fitness, exposure to stressors, body mass index (BMI), and even life  
44 expectancy<sup>2-6</sup>.

45 DNAm clocks were initially reported for humans<sup>7,8</sup>. Since then, the age estimator has been  
46 extended to model organisms<sup>9-11</sup>, and different variants of human clocks have also been  
47 developed. Some clocks are tissue specific, others are pan-tissue, and others perform well at  
48 predicting health and life expectancy<sup>5,8,12-14</sup>.

49 A new microarray platform was recently developed to profile CpGs that have high conservation  
50 across mammalian clades. This pan-mammalian DNAm array (HorvathMammalMethylChip40)  
51 provides a common platform to measure DNAm, and has been used to build universal  
52 epigenetic clocks that can estimate age across a variety of tissues and mammalian species<sup>15,16</sup>.  
53 Another remarkable development with this array is the novel lifespan predictor that can  
54 estimate the maximum lifespan of over 190 mammals at high accuracy<sup>17</sup>.

55 Here, we examine these novel clocks, lifespan predictor, and methylome entropy in a cohort of  
56 mice belonging to the BXD family that were maintained on either normal chow or high-fat diet  
57 (HFD)<sup>18,19</sup>. The BXDs are a well-established mouse genetic reference panel that were first  
58 created as a family of recombinant inbred (RI) strains by crossing two inbred progenitors:  
59 C57BL/6J (B6) and DBA/2J (D2). The family has been expanded to ~150 fully sequenced progeny  
60 strains<sup>20,21</sup>. Members of the BXD family vary greatly in their metabolic profiles, aging rates, and  
61 natural life expectancy<sup>18,19,22-24</sup>. The genetic variation, and the availability of accompanying  
62 deep -omic data make the BXDs a unique experimental population for dissecting the genetic  
63 modulators of epigenetic aging. Previously, we explored the aging methylome in a small  
64 number of BXD cases and found that HFD and higher body weight were associated with higher  
65 age-dependent changes in methylation<sup>25</sup>. In the present work, our goals were to (1) test the  
66 accuracy of the DNAm measures in predicting age, lifespan, and association with diet and  
67 metabolic characteristics, and (2) apply quantitative trait locus (QTL) mapping and gene  
68 expression analyses to uncover loci and genes that contribute to these DNAm biomarkers.

69 Our results are consistent with a faster clock for cases on HFD, and with higher body weight.  
70 Both the DNAmAge and lifespan predictors were correlated with the genotype-dependent life  
71 expectancy of female BXDs. We report QTLs on chromosomes (Chrs) 11 and 19. A strong  
72 candidate gene in the chromosome (Chr) 11 interval (referred to as *Eaaq11*) is *Stxbp4*, a gene  
73 that has been consistently associated with EAA by human genome-wide association studies  
74 (GWAS)<sup>26-28</sup>. The Chr19 QTL (*Eaaq19*) also harbors strong contenders including *Cyp26a1*, *Myof*,  
75 *Cutc*, and *Nkx2-3*, and the conserved genes in humans have been associated with longevity and

76 EAA<sup>28-30</sup>. *Eaaq19* may also have an effect on body weight change with age. We performed gene  
 77 expression analyses to clarify the physiology associated with the DNAm traits, and this, perhaps  
 78 unsurprisingly, highlighted metabolic networks as strong expression correlates of epigenetic  
 79 aging.

## 80 Results

### 81 Description of samples

82 The present study uses liver DNAm data from 339 predominantly female mice (18 males only)  
 83 belonging to 45 isogenic members of the BXD family, including F1 hybrids, and both parental  
 84 strains. Age ranged from 5.6 to 33.4 months. Mice were all weaned onto a normal chow  
 85 (control diet; CD) and a balanced subset of cases were then randomly assigned to the HFD (see  
 86 Roy et al for details<sup>18</sup>). Tissues were collected at approximately six months intervals (see  
 87 Williams et al.<sup>19</sup>). Individual-level data of cases used in this study are in **Data S1**.

### 88 Correlation with chronological age

89 For biological age prediction, three different types of mouse DNAm clocks were computed,  
 90 each as a pair: liver-specific, and pan-tissue (**Table 1**). These are: (1) a general DNAm clock  
 91 (referred to simply as DNAmAge): clock trained without pre-selecting for any specific CpG  
 92 subsets; (2) developmental clock (dev.DNAmAge): built from CpGs that change during  
 93 development; and (3) interventional clock (int.DNAmAge): built from CpGs that change in  
 94 response to aging related interventions such as caloric restriction, HFD, or dwarfing alleles<sup>9,11,25</sup>.  
 95 These clocks were trained either in an independent mouse dataset that did not include the  
 96 BXDs and were therefore unbiased to BXD characteristics (unbiased mouse clocks), or trained in  
 97 a subset of the BXD CD mice and used to estimate age in the full BXD cohort (BXD-biased

**Table 1. Epigenetic predictors and correlation with chronological age and entropy**

| Clock type     | Training set <sup>1</sup> | DNAmAge name    | Tissue | r with age (n=339) | r with entropy (n=339) |
|----------------|---------------------------|-----------------|--------|--------------------|------------------------|
| Standard       | unbiased                  | DNAmAge         | pan    | 0.89               | 0.50                   |
| Standard       | unbiased                  | DNAmAge         | liver  | 0.92               | 0.51                   |
| Developmental  | unbiased                  | dev.DNAmAge     | pan    | 0.87               | 0.46                   |
| Developmental  | unbiased                  | dev.DNAmAge     | liver  | 0.91               | 0.45                   |
| Interventional | unbiased                  | int.DNAmAge     | pan    | 0.85               | 0.38                   |
| Interventional | unbiased                  | int.DNAmAge     | liver  | 0.86               | 0.49                   |
| Standard       | BXD                       | DNAmAge         | pan    | 0.93               | 0.55                   |
| Standard       | BXD                       | DNAmAge         | liver  | 0.97               | 0.54                   |
| Developmental  | BXD                       | dev.DNAmAge     | pan    | 0.95               | 0.51                   |
| Developmental  | BXD                       | dev.DNAmAge     | liver  | 0.96               | 0.51                   |
| Interventional | BXD                       | int.DNAmAge     | pan    | 0.89               | 0.43                   |
| Interventional | BXD                       | int.DNAmAge     | liver  | 0.94               | 0.53                   |
| Universal      | unbiased                  | univ.DNAmAge    | pan    | 0.92               | 0.59                   |
| Lifespan       | unbiased                  | Predicted-maxLS | pan    | -0.07 (ns)         | -0.13 (p=0.02)         |

<sup>1</sup> *Unbiased* denotes that the clocks were trained in a completely independent dataset.

98 clocks). In addition to the mouse clocks, we estimated DNAmAge using the universal  
 99 mammalian clock (univ.DNAmAge)<sup>15</sup>. The clocks performed well in age estimation (**Table 1; Fig**  
 100 **1a**). The EAA derived from these clocks showed wide individual variation (**Fig 1b**), but the EAA  
 101 values are uncorrelated with chronological age.

102 We used the universal maximum lifespan predictor<sup>17</sup> to estimate the potential  
 103 maximum lifespan (predicted-maxLS) of mice. Predicted-maxLS was uncorrelated  
 104 with chronological age (**Table 1**), and this is expected since the chronological age  
 105 represents the time when the biospecimens were collected; not the time of natural  
 106 demise. Instead, the predicted-maxLS showed an overall inverse correlation with  
 107 EAA from the different clocks, and this suggests higher age-acceleration for mice  
 108 with lower predicted-maxLS (**Data S2**).

### 115 Association with methylome entropy

116 The methylome-wide entropy provides a measure of randomness and information  
 117 loss, and this increased with chronological age (**Fig 1c**)<sup>7</sup>. As direct correlates of  
 118 chronological age, all the DNAmAge were positively correlated with entropy (**Table 1**).  
 119  
 120  
 121

122 We hypothesized that higher entropy levels will be associated with (a) higher EAA, and  
 123 (b) lower predicted-maxLS. Indeed, the univ.EAA had a significant positive  
 124 correlation with entropy that was significant regardless of diet (**Fig 1d**). However, the EAA  
 125 from the unbiased mouse clocks showed only weak correlations with entropy (**Data**  
 126 **S2**). Entropy had a modest negative correlation with predicted-maxLS primarily  
 127 in the CD group (**Fig 1e**). Taken together, our results indicate that discordance in the  
 128 methylome increases with age, and is higher with higher univ.EAA. Mice with shorter  
 129 predicted-maxLS may also had slightly higher entropy.  
 130  
 131  
 132  
 133  
 134  
 135  
 136  
 137  
 138

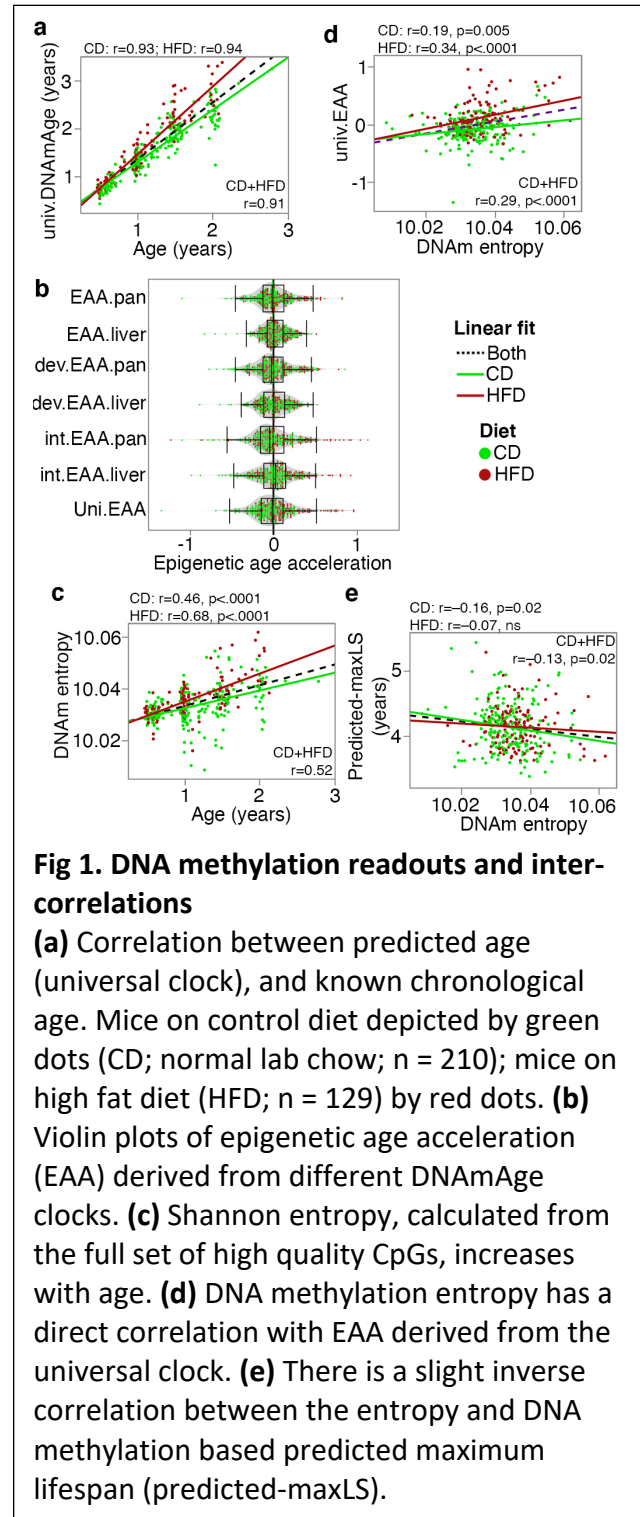

139 **How the epigenetic readouts relate to diet, body weight, and sex**

140 **Diet.** EAA from most of the clocks, including the universal clock, were significantly higher in the  
 141 HFD (**Table 2**). Entropy was also significantly higher in the HFD group. The maxLS did not  
 142 differentiate between diets (**Table 2**).

143 **Body weight.** Body weight was first measured when mice were at an average age of  $4.5 \pm 2.7$   
 144 months. We refer to this initial weight as baseline body weight (BW0). For mice on HFD, this

**Table 2. Association with diet and weight, and heritability of the epigenetic readouts**

| Type                   | EAA                 | Diet         | Mean (SD)      | Diet (p) | r BW0 <sup>a</sup> | p BW0  | r BWF <sup>a</sup> | p BWF  | H <sup>2</sup> | Strain r <sup>b</sup> |
|------------------------|---------------------|--------------|----------------|----------|--------------------|--------|--------------------|--------|----------------|-----------------------|
| Unbiased DNAm clocks   | EAA, pan            | CD           | -0.05 ± 0.21   | <.0001   | 0.19               | 0.006  | 0.29               | <.0001 | 0.49           | 0.54                  |
|                        |                     | HFD          | 0.07 ± 0.21    |          | 0.21               | 0.01   | 0.42               | <.0001 | 0.50           |                       |
|                        | EAA, liver          | CD           | 0 ± 0.17       | ns       | 0.09               | ns     | 0.20               | 0.003  | 0.40           | 0.73                  |
|                        |                     | HFD          | 0.03 ± 0.14    |          | 0.22               | 0.01   | 0.49               | <.0001 | 0.52           |                       |
|                        | dev.EAA, pan        | CD           | -0.04 ± 0.23   | 0.004    | 0.09               | ns     | 0.22               | 0.001  | 0.53           | 0.76                  |
|                        |                     | HFD          | 0.03 ± 0.22    |          | 0.27               | 0.002  | 0.45               | <.0001 | 0.61           |                       |
|                        | dev.EAA, liver      | CD           | 0 ± 0.2        | ns       | 0.19               | 0.002  | 0.29               | <.0001 | 0.46           | 0.78                  |
|                        |                     | HFD          | 0 ± 0.16       |          | 0.29               | 0.0007 | 0.47               | <.0001 | 0.60           |                       |
| int.EAA, pan           | CD                  | -0.05 ± 0.25 | 0.0003         | 0.03     | ns                 | 0.21   | 0.002              | 0.27   | 0.66           |                       |
|                        | HFD                 | 0.06 ± 0.33  |                | 0.22     | 0.01               | 0.46   | <.0001             | 0.45   |                |                       |
| int.EAA, liver         | CD                  | -0.04 ± 0.22 | <.0001         | 0.05     | ns                 | 0.18   | 0.01               | 0.59   | 0.80           |                       |
|                        | HFD                 | 0.11 ± 0.25  |                | 0.27     | 0.002              | 0.58   | <.0001             | 0.54   |                |                       |
| BXD biased DNAm clocks | EAA.BXD, pan        | CD           | -0.06 ± 0.15   | <.0001   | 0.08               | ns     | 0.17               | 0.01   | 0.26           | 0.22                  |
|                        |                     | HFD          | 0.09 ± 0.19    |          | 0.17               | 0.05   | 0.37               | <.0001 | 0.42           |                       |
|                        | EAA.BXD, liver      | CD           | 0 ± 0.11       | 0.01     | -0.04              | ns     | 0.06               | ns     | 0.18           | 0.37                  |
|                        |                     | HFD          | 0.03 ± 0.11    |          | 0.18               | 0.04   | 0.41               | <.0001 | 0.34           |                       |
|                        | dev.EAA.BX D, pan   | CD           | -0.03 ± 0.13   | <.0001   | -0.08              | ns     | 0                  | ns     | 0.25           | 0.43                  |
|                        |                     | HFD          | 0.05 ± 0.16    |          | 0.13               | ns     | 0.40               | <.0001 | 0.49           |                       |
|                        | dev.EAA.BX D, liver | CD           | -0.01 ± 0.13   | 0.002    | 0.07               | ns     | 0.11               | ns     | 0.26           | 0.45                  |
|                        |                     | HFD          | 0.03 ± 0.12    |          | 0.21               | 0.02   | 0.47               | <.0001 | 0.40           |                       |
| int.EAA.BXD, pan       | CD                  | -0.05 ± 0.19 | <.0001         | 0        | ns                 | 0.18   | 0.01               | 0.19   | 0.72           |                       |
|                        | HFD                 | 0.07 ± 0.3   |                | 0.20     | 0.03               | 0.42   | <.0001             | 0.41   |                |                       |
| int.EAA.BXD, liver     | CD                  | -0.03 ± 0.16 | <.0001         | -0.04    | ns                 | 0.06   | ns                 | 0.39   | 0.78           |                       |
|                        | HFD                 | 0.09 ± 0.16  |                | 0.23     | 0.01               | 0.60   | <.0001             | 0.40   |                |                       |
| Universal clock        | univ.EAA            | CD           | -0.08 ± 0.22   | <.0001   | 0                  | ns     | 0.11               | ns     | 0.37           | 0.67                  |
|                        |                     | HFD          | 0.13 ± 0.27    |          | 0.35               | <.0001 | 0.50               | <.0001 | 0.43           |                       |
| Entropy                | -                   | CD           | 10.034 ± 0.007 | 0.004    | -0.15              | 0.03   | -0.34              | <.0001 | 0.39           | 0.20 (ns)             |
|                        |                     | HFD          | 10.036 ± 0.007 |          | -0.11              | 0.21   | 0                  | ns     | 0.23           |                       |
| Pred-maxLS             | -                   | CD           | 4.14 ± 0.37    | ns       | 0.03               | ns     | 0.05               | ns     | 0.66           | 0.89                  |
|                        |                     | HFD          | 4.15 ± 0.32    |          | -0.06              | ns     | -0.11              | 0.20   | 0.70           |                       |

<sup>a</sup> BW0 is body weight at about 4.5 months of age (n = 339; 210 CD and 129 HFD); BWF is final weight at tissue collection (1 HFD case missing data; n = 338; 210 CD and 128 HFD)

<sup>b</sup> Pearson correlation between strain means for n = 29 BXD genotypes kept on CD and HFD

145 was usually before introduction to the diet, with the exception of 48 cases that were first  
 146 weighed 1 or 3 days after HFD (**Data S1**). In the CD group, only the unbiased EAA (pan-tissue)  
 147 and dev.EAA (liver) showed significant positive correlations with BW0 (**Table 2**). In the HFD  
 148 group, the positive correlation with BW0 was more robust and consistent across all the clocks,  
 149 and this may have been due to the inclusion of the 48 cases that had been on HFD for 1 or 3  
 150 days. Taking only these 48 cases, we found that higher weight even after 1 day of HFD had an  
 151 age-accelerating effect (**Data S2**). This was particularly strong for the unbiased interventional  
 152 clocks ( $r = 0.45$ ,  $p = 0.001$  for int.EAA, pan-tissue;  $r = 0.58$ ,  $p < 0.0001$  for int.EAA, liver), and for  
 153 the universal clock (**Fig 2a**). Second weight was measured  $7.4 \pm 5.2$  weeks after BW0 (mean age  
 154  $6.3 \pm 2.8$  months). We refer to this as BW1 and we estimated the weight change as  $\Delta BW =$   
 155  $BW1 - BW0$ .  $\Delta BW$  was a positive correlate of EAA on both diets, albeit more pronounced in  
 156 the HFD group (**Fig 2b**; **Data S2**). The final body weight (BWF) was measured at the time of  
 157 tissue harvest, and EAA from all the unbiased clocks were significant correlates of BWF on both  
 158 diets (**Table 2**).

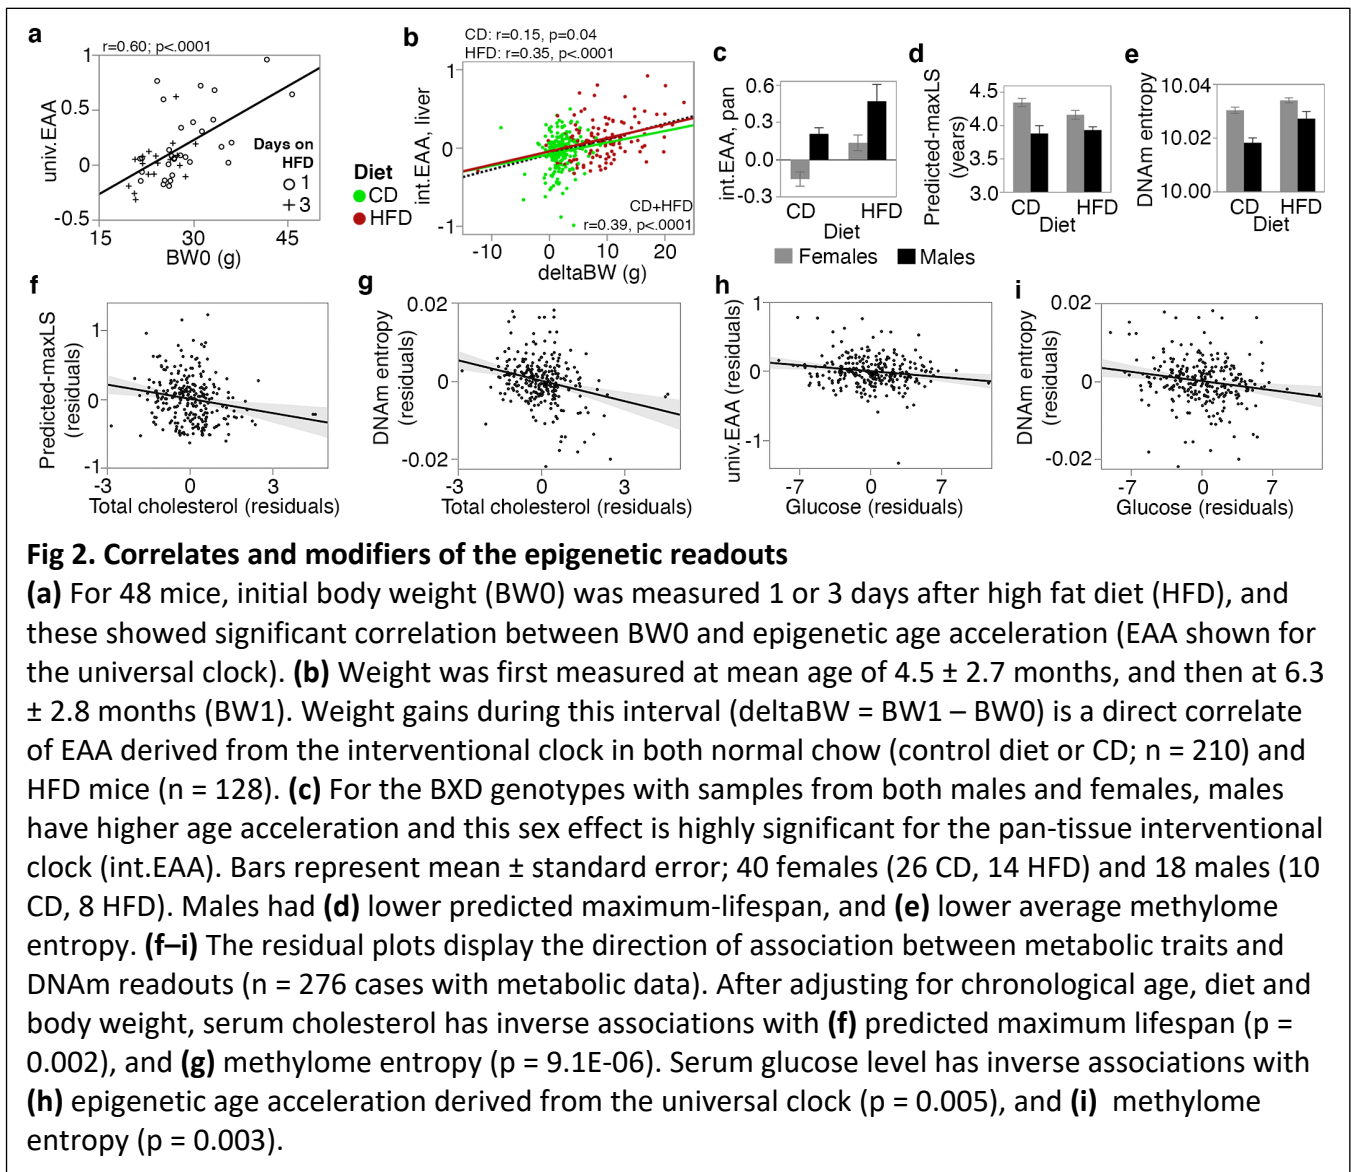

159 Somewhat unexpected, entropy had an inverse correlation with body weight. This effect was  
160 primarily in the CD mice (**Table 2**). We found no association between predicted-maxLS and the  
161 body weight traits (**Table 2**).

162 **Sex effect.** Four BXD genotypes (B6D2F1, D2B6F1, BXD102, B6) had cases from both males and  
163 females. We used these to test for sex effects. All the unbiased mouse clocks showed significant  
164 age acceleration in male mice, and this effect was particularly strong for the pan-tissue int.EAA  
165 (**Fig 2c; Data S2**). The predicted-maxLS was significantly lower in males (**Fig 2d**). Entropy on the  
166 other hand, was significantly higher in females (**Fig 2e**).

### 167 **Association with metabolic traits**

168 276 cases with DNAm data also had fasted serum glucose and total cholesterol<sup>18,19</sup>, and we  
169 examined whether these metabolic traits are associated with the DNAm readouts. We applied  
170 regression analysis with age, diet and final body weight as covariates, and this showed  
171 significant effects of cholesterol on predicted-maxLS ( $p = 0.002$ ), and entropy ( $p = 9E-06$ ) (**Table**  
172 **S1**). To visualize how cholesterol levels associate with these, we plotted the residual values  
173 after the respective predictor and outcome variables were adjusted for age, diet, and BWF. The  
174 residual plot shows an inverse association between cholesterol and predicted-maxLS (**Fig 2f**).  
175 For entropy, similar to how it related with weight, higher cholesterol predicted lower entropy.  
176 Cholesterol had no significant association with univ.EAA (**Table S1**).

177 Glucose had an unexpected inverse association with the univ.EAA that predicts lower age  
178 acceleration with higher glucose ( $p = 0.005$ ) (**Fig 2h; Table S1**). Lower glucose also predicted  
179 higher entropy ( $p = 0.003$ ) (**Fig 2i**). Glucose was not associated with predicted-maxLS (**Table S1**).

### 180 **Association with strain longevity**

181 We next obtained longevity data from a parallel cohort of female BXD mice that were allowed  
182 to age on CD or HFD<sup>18</sup>. We evaluated whether the DNAm readouts were informative of strain-  
183 level lifespan. Since the strain lifespan was determined from female BXDs, we restricted this to  
184 only the female cases. For strains with natural death data from  $n \geq 5$ , we computed the  
185 minimum (minLS), 25<sup>th</sup> quartile (25Q-LS), mean, median lifespan, 75<sup>th</sup> quartile (75Q-LS), and  
186 maximum lifespan (maxLS) (**Data S1**). Specifically, we postulated (a) an accelerated clock for  
187 strains with shorter lifespan (i.e., inverse correlation), (b) a direct correlation between  
188 predicted-maxLS and observed lifespan, and (c) higher entropy with shorter lifespan.

189 Overall, the EAA measures showed the expected inverse correlation trend with the lifespan  
190 summaries, and this was highly significant for the universal clock (**Table S2; Fig 3a,b**). For the  
191 mouse clocks, this effect was significant for the liver int.EAA (**Table S2**). When separated by  
192 diet, these correlations became weaker, but the negative trend remained consistent.

193 The DNAm entropy had an inverse correlation trend with strain lifespan (**Table S2**). This was  
194 nominally significant only for the strain maxLS when CD and HFD groups were combined ( $r = -$   
195  $0.13$ ,  $p = 0.02$ ) but became non-significant when separated by diet.

196 The predicted-maxLS showed a positive correlation trend with the lifespan summaries, and this  
197 was significant for the observed strain maxLS (**Fig 3d**). When separated by diet, the predicted-  
198 maxLS remained a significant correlate of strain maxLS only in the CD group.



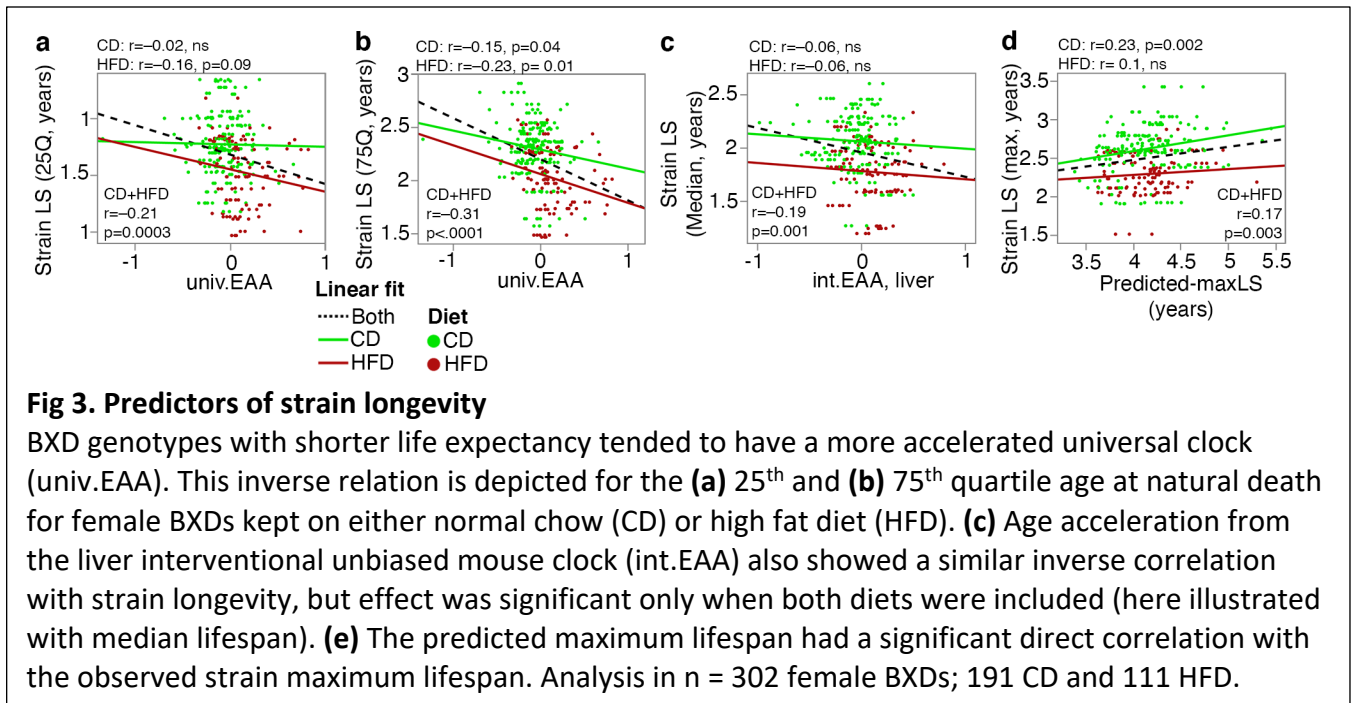

### 199 Genetic analysis of epigenetic age acceleration and predicted-maxLS

200 The EAA traits had modest to high heritability, and averaged at 0.50 for the unbiased mouse  
 201 clocks (**Table 2**). The predicted-maxLS had heritability of 0.66 on CD, and 0.70 on HFD. Another  
 202 way to gauge level of genetic correlation is to compare between members of strains maintained  
 203 on different diets. The EAA from the unbiased and universal clocks, and predicted-maxLS had  
 204 high strain-level correlations between diets that indicates an effect of background genotype  
 205 that is robust to dietary differences (**Table 2**). The genotype correlations were slightly lower for  
 206 the BXD-biased clocks.

207 To uncover genetic loci, we applied QTL mapping using mixed linear modeling that corrects for  
 208 the BXD kinship structure<sup>31</sup>. First, we performed the QTL mapping for each of the unbiased  
 209 mouse and universal clocks, with adjustment for diet and body weight. EAA from the two  
 210 interventional clocks had the strongest QTLs (**Data S3**). The pan-tissue int.EAA had a significant  
 211 QTL on Chr11 (90–99 Mb) with the highest linkage at ~93 Mb ( $p = 3.5E-06$ ; equivalent to a LOD  
 212 score of 4.7) (**Fig 4a**). Taking a genotype marker at the peak interval (BXD variant ID  
 213 DA0014408.4 at Chr11, 92.750 Mb)<sup>20</sup>, we segregated the BXDs homozygous for either the D2  
 214 (*DD*) or the B6 (*BB*) alleles. The *DD* genotype had a significantly more accelerated int.EAA (**Fig**  
 215 **4a** inset). The liver int.EAA had the peak QTL on Chr19 (35–45 Mb) with the most significant  
 216 linkage at markers between 38–42 Mb ( $p = 9E-07$ ; LOD score of 5.2) (**Fig 4b**). We selected a  
 217 marker at the peak interval (rs48062674 at Chr19, 38.650 Mb), and the *BB* genotype had  
 218 significantly higher int.EAA compared to *DD* (**Fig 4b** inset). The QTL map for the univ.EAA did  
 219 not reach genome-wide significance (**Fig 4c**). However, there were nominally significant peaks  
 220 at the Chr19 ( $p = 0.0004$ ), and Chr11 ( $p = 0.004$ ) intervals.

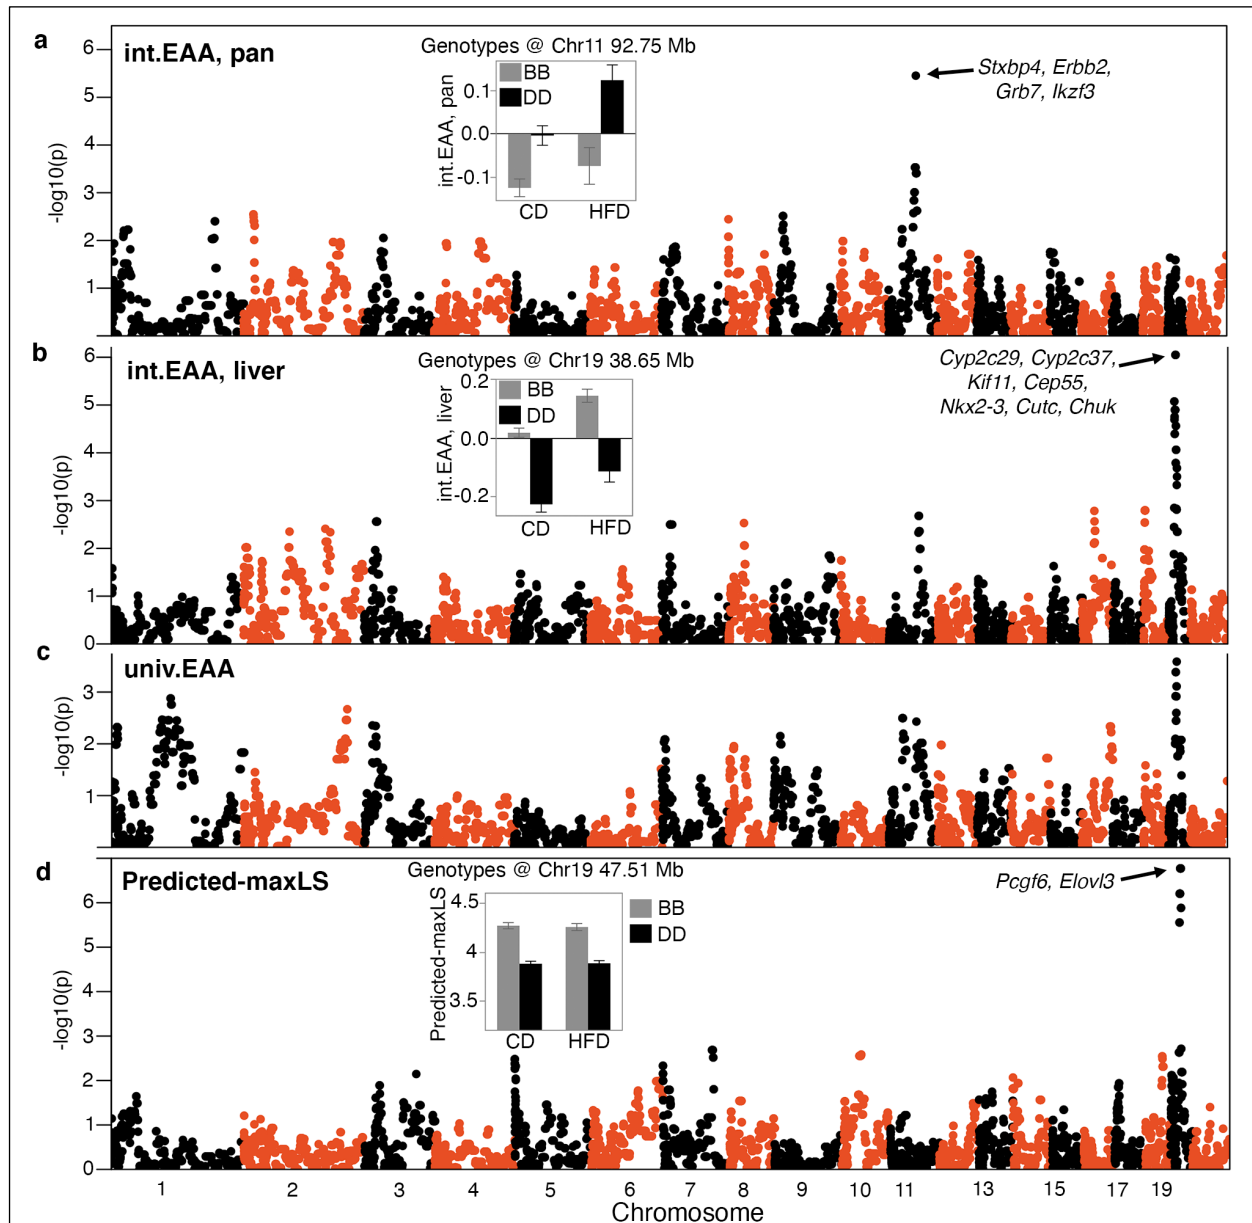

**Fig 4. Genetic linkage analysis**

The Manhattan plots represent the location of genotyped markers (x-axis), and linkage  $-\log_{10}(p)$  (y-axis). **(a)** The peak quantitative trait locus (QTL) for age acceleration from the pan-tissue interventional clock (int.EAA) is on chromosome (Chr) 11 at  $\sim 93$  Mb. The inset shows the mean ( $\pm$  standard error) trait values for BXDs that are homozygous for the C57BL/6J allele (BB; grey) versus BXDs homozygous for the DBA/2J allele (DD; black). **(b)** The liver-specific int.EAA has a peak QTL on Chr19 ( $\sim 38$  Mb). Trait means by genotype at this locus are shown in inset. **(c)** The linkage statistics are weaker for the EAA derived from the universal clock (univ.EAA). However, there are consistent nominally significant peaks on the Chr11 and Chr19 loci. **(d)** The DNA methylation based predicted maximum lifespan also maps to Chr19, but the peak markers are at  $\sim 47.5$  Mb.

221 We next performed QTL mapping for DNAm entropy with adjustment for major covariates (diet,

222 chronological age, and body weight). No locus reached genome-wide significance (**DataS3**).  
223 There were modest QTLs on Chrs11 and 19. However, the Chr11 region is slightly distal to the  
224 markers linked to the EAA traits (minimum  $p = 0.009$  at Chr11, ~103.7 Mb). The Chr19 locus  
225 somewhat overlapped the QTL for EAA, but the peak marker (minimum  $p = 0.0009$ ) is slightly  
226 distal at ~48 Mb (**Data S3**).

227 The predicted-maxLS had a significant QTL on Chr19 (**Fig 4d; Data S3**) with the peak markers  
228 between 44–48 Mb ( $p = 2E-07$ ; LOD score of 5.9). This overlaps the EAA QTL, but the peak  
229 markers are also distal (rs30567369 at 47.510 Mb). At this locus, mice with the *BB* genotype  
230 had significantly higher predicted-maxLS (**Fig 4d** inset).

### 231 **Consensus QTLs for epigenetic age acceleration**

232 To identify regulatory loci that are consistent across the different EAA measures, we applied a  
233 multi-trait analysis and derived the linkage meta-p-value for the unbiased mouse and universal  
234 EAA traits<sup>32</sup>. The peaks on Chrs 11 and 19 attained the highest consensus p-values (**Fig S1a;**  
235 **Data S3**). Additional consensus peaks (at  $-\log_{10}\text{meta-p} > 6$ ) were observed on Chrs 1 (~152 Mb),  
236 and 3 (~54 Mb).

237 We focus on the Chrs 11 and 19 QTLs and refer to these as *EAA QTL on Chr 11* (*Eaaq11*), and  
238 *EAA QTL on Chr 19* (*Eaaq19*). *Eaaq11* extends from 90–99 Mb. For *Eaaq19*, we delineated a  
239 broader interval from 35–48 Mb that also encompasses the peak markers for the predicted-  
240 maxLS, albeit these may be separate loci related to EAA (~39 Mb of *Eaaq19*), and predicted-  
241 maxLS (~47 Mb of *Eaaq19*).

242 We performed marker-specific linkage analyses for each of the unbiased mouse and universal  
243 clocks using a regression model that adjusted for diet. With the exception of the liver int.EAA,  
244 all the EAA traits had nominal to highly significant associations with the representative *Eaaq11*  
245 marker (DA0014408.4), and the *DD* genotype had higher age acceleration (**Table 3**). Mean plots  
246 by genotype and diet shows that this effect was primarily in the CD mice (**Fig S1b**). The effect of  
247 this locus appeared to be higher for the pan-tissue clocks compared to the corresponding liver-  
248 specific clocks. This marker in *Eaaq11* was not associated with either entropy or predicted-  
249 maxLS.

250 For proximal *Eaaq19*, the representative marker (rs48062674) was associated with all the EAA  
251 traits and the *BB* mice had higher age acceleration on both diets (**Fig S1c**). This marker was not  
252 associated with entropy, and had only a weak effect on predicted-maxLS (**Table 3**). When we  
253 performed the same analysis with the marker on distal *Eaaq19* (rs30567369), the association  
254 with EAA became weaker, and the association with predicted-maxLS became much stronger  
255 (**Table 3**). This suggests that the proximal part of *Eaaq19* is related to EAA while the distal part  
256 is related to predicted-maxLS.

257 We also tested if these peak markers were associated with the recorded lifespan phenotype  
258 and we found no significant association with the observed lifespan of the BXDs.

### 259 **Association of EAA QTLs with body weight trajectory**

**Table 3: Marker specific linkage analyses for epigenetic age acceleration, predicted maximum lifespan, and body weight trajectory**

| Predictor                                                                                                       | Outcome        | Estimate | Std Error | t Ratio | p       |
|-----------------------------------------------------------------------------------------------------------------|----------------|----------|-----------|---------|---------|
| <i>Eaaq11</i><br>DA0014408.4[DD]<br>Chr11, 92.750 Mb<br>(133 <i>BB</i> cases,<br>and 173 <i>DD</i> cases)       | EAA, pan       | 0.096    | 0.023     | 4.184   | 3.8E-05 |
|                                                                                                                 | EAA, liver     | 0.067    | 0.017     | 3.880   | 0.0001  |
|                                                                                                                 | dev.EAA, pan   | 0.077    | 0.025     | 3.041   | 0.003   |
|                                                                                                                 | dev.EAA, liver | 0.037    | 0.020     | 1.878   | 0.06    |
|                                                                                                                 | int.EAA, pan   | 0.153    | 0.029     | 5.278   | 2.5E-07 |
|                                                                                                                 | int.EAA, liver | -0.033   | 0.025     | -1.284  | 0.20    |
|                                                                                                                 | univ.EAA       | 0.101    | 0.025     | 4.057   | 6.3E-05 |
| <i>Eaaq19</i><br>rs48062674[DD]<br>Chr19, 38.650 Mb<br>(238 <i>BB</i> cases,<br>and 67 <i>DD</i> cases)         | EAA, pan       | -0.083   | 0.028     | -2.954  | 0.003   |
|                                                                                                                 | EAA, liver     | -0.137   | 0.020     | -6.972  | 2.0E-11 |
|                                                                                                                 | dev.EAA, pan   | -0.206   | 0.029     | -7.218  | 4.3E-12 |
|                                                                                                                 | dev.EAA, liver | -0.124   | 0.023     | -5.461  | 9.9E-08 |
|                                                                                                                 | int.EAA, pan   | -0.143   | 0.035     | -4.028  | 7.1E-05 |
|                                                                                                                 | int.EAA, liver | -0.250   | 0.027     | -9.238  | 4.6E-18 |
|                                                                                                                 | univ.EAA       | -0.145   | 0.029     | -4.932  | 1.3E-06 |
|                                                                                                                 | Pred-maxLS     | -0.100   | 0.048     | -2.086  | 0.04    |
| <i>Distal Eaaq19</i><br>rs30567369[DD]<br>Chr19, 47.510 Mb<br>(198 <i>BB</i> cases,<br>and 106 <i>DD</i> cases) | int.EAA, liver | -0.079   | 0.026     | -2.995  | 0.003   |
|                                                                                                                 | univ.EAA       | -0.053   | 0.026     | -2.012  | 0.05    |
|                                                                                                                 | Pred-maxLS     | -0.383   | 0.036     | -10.781 | 3.9E-23 |
| <b>Mixed model for longitudinal change in body weight</b>                                                       |                |          |           |         |         |
| Predictor                                                                                                       | Outcome        | Estimate | Std Error | t Ratio | p       |
| <i>Eaaq11</i><br>DA0014408.4[DD]<br>Number of<br>observations =<br>6885; number of<br>individuals = 2112        | Body weight    | 0.619    | 0.345     | 1.794   | 0.07    |
| <i>Eaaq19</i><br>rs48062674[DD]<br>Number of<br>observations =<br>6132; number of<br>individuals = 1852         | Body weight    | -1.847   | 0.374     | -4.945  | 7.6E-07 |
| <i>Distal Eaaq19</i><br>rs30567369[DD]<br>Number of<br>observations =<br>6059; number of<br>individuals = 1802  | Body weight    | -1.619   | 0.363     | -4.458  | 8.3E-06 |

260 Since body weight gains was an accelerator of the clocks, we examined whether the selected  
 261 markers in *Eaaq11* and *Eaaq19* were also related to body weight change. We retrieved  
 262 longitudinal weight data from a larger cohort of the aging BXD mice that were weighed at

263 regular intervals. After excluding  
264 heterozygotes, we tested the effect of  
265 genotype. Concordant with the higher  
266 EAA for the *DD* genotype at *Eaaq11* in the  
267 CD group, the *DD* genotype in the CD  
268 group also had slightly higher mean  
269 weight at older adulthood (12 and 18  
270 months; **Fig 5a**). However, this marker  
271 had no significant association with body  
272 weight when tested using a mixed effects  
273 model ( $p = 0.07$ ; **Table 3**). In proximal  
274 *Eaaq19*, it was the *BB* genotype that  
275 exhibited consistently accelerated clock  
276 on both diets, and the *BB* genotype also  
277 had higher average body weight by 6  
278 months of age (**Fig 5b**), and this locus had  
279 a significant influence on the body weight  
280 trajectory ( $p = 7.6E-07$ ; **Table 3**). The  
281 nearby marker on distal *Eaaq19* also  
282 showed a similar pattern of association  
283 with body weight (**Table 3**).

### 284 **Candidate genes for epigenetic age** 285 **acceleration**

286 There are several positional candidate genes in *Eaaq11* and *Eaaq19*. To narrow the list, we  
287 applied two selection criteria: genes that (1) contain missense and/or stop variants, and/or (2)  
288 contain non-coding variants and regulated by a cis-acting expression QTL (eQTL). For the eQTL  
289 analysis, we utilized an existing liver transcriptome data from the same aging cohort<sup>19</sup>. We  
290 identified 24 positional candidates in *Eaaq11* that includes *Stxbp4*, *ErbB2* (*Her-2* oncogenic  
291 gene), and *Grb7* (growth factor receptor binding) (**Data S4**). *Eaaq19* has 81 such candidates that  
292 includes a cluster of cytochrome P450 genes, and *Chuk* (inhibitor of NF- $\kappa$ B) in the proximal  
293 region, and *Pcgf6* (epigenetic regulator) and *Elov13* (lipid metabolic gene) in the distal region  
294 (**Data S4**).

295 For further prioritization, we converted the mouse QTL regions to the corresponding syntenic  
296 regions in the human genome, and retrieved GWAS annotations for these regions<sup>33</sup>. We  
297 specifically searched for the traits: epigenetic aging, longevity, age of  
298 menarche/menopause/puberty, Alzheimer's disease, and age-related cognitive decline and  
299 dementia. This highlighted 5 genes in *Eaaq11*, and 3 genes in *Eaaq19* (**Table S4**). We also  
300 identified a GWAS study that found associations between variants near *Myof-Cyp26a1* and  
301 human longevity<sup>30</sup>, and a meta-GWAS that found gene-level associations between *Nkx2-3* and  
302 *Cutc*, and epigenetic aging<sup>28</sup> (**Table S4**).

### 303 **Gene expression correlates of EAA and predicted max-LS**

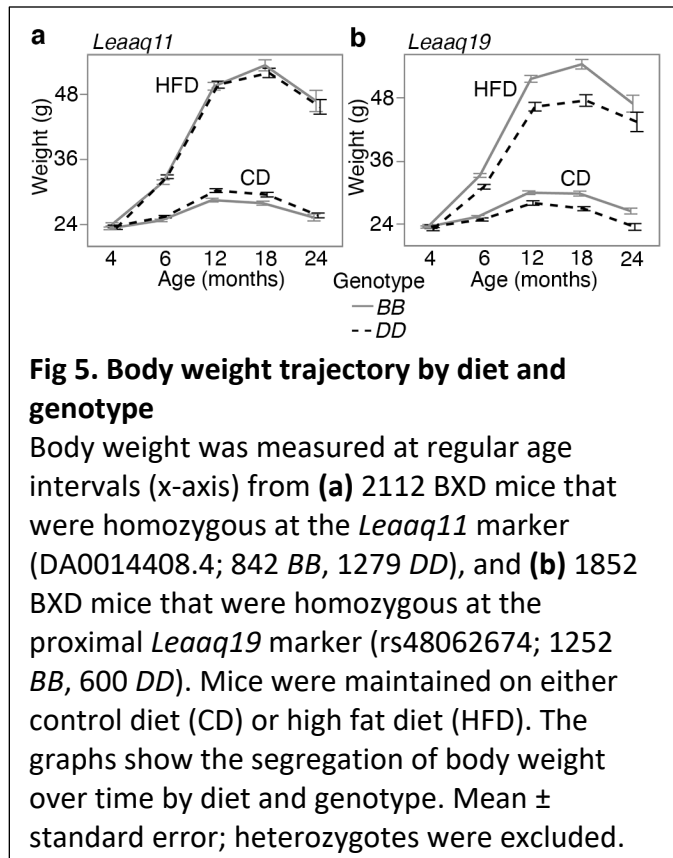

304 Liver RNA-seq data was available for 153 of the BXD cases that had DNAm data (94 CD, and 59  
305 HFD)<sup>19</sup>. We used this set to perform transcriptome-wide correlation analysis for the univ.EAA.  
306 To gain insights into gene functions, we selected the top 2000 transcriptome correlates ( $|r| \geq$   
307  $0.37$ ,  $p \leq 2.8E-06$ ; **Data S5**) for functional enrichment analysis. These top correlates represented  
308 transcript variants from 1052 unique genes and included a few positional candidates (e.g., *Ikzf3*,  
309 *Kif11*, *Cep55*, *Cyp2c29*, *Cyp2c37*). Only 62 transcripts from 36 unique genes were negatively  
310 correlated with univ.EAA, and this set was significantly enriched (Bonferroni correct  $p < 0.05$ ) in  
311 oxidation-reduction, and metabolic pathways (**Data S6**; **Fig 6a**). These functional categories  
312 included the cytochrome genes, *Cyp2c29* and *Cyp2c37*, located in *Eaaq19*. This set was also  
313 highly liver specific. The positive correlates were enriched in a variety of gene functions, and

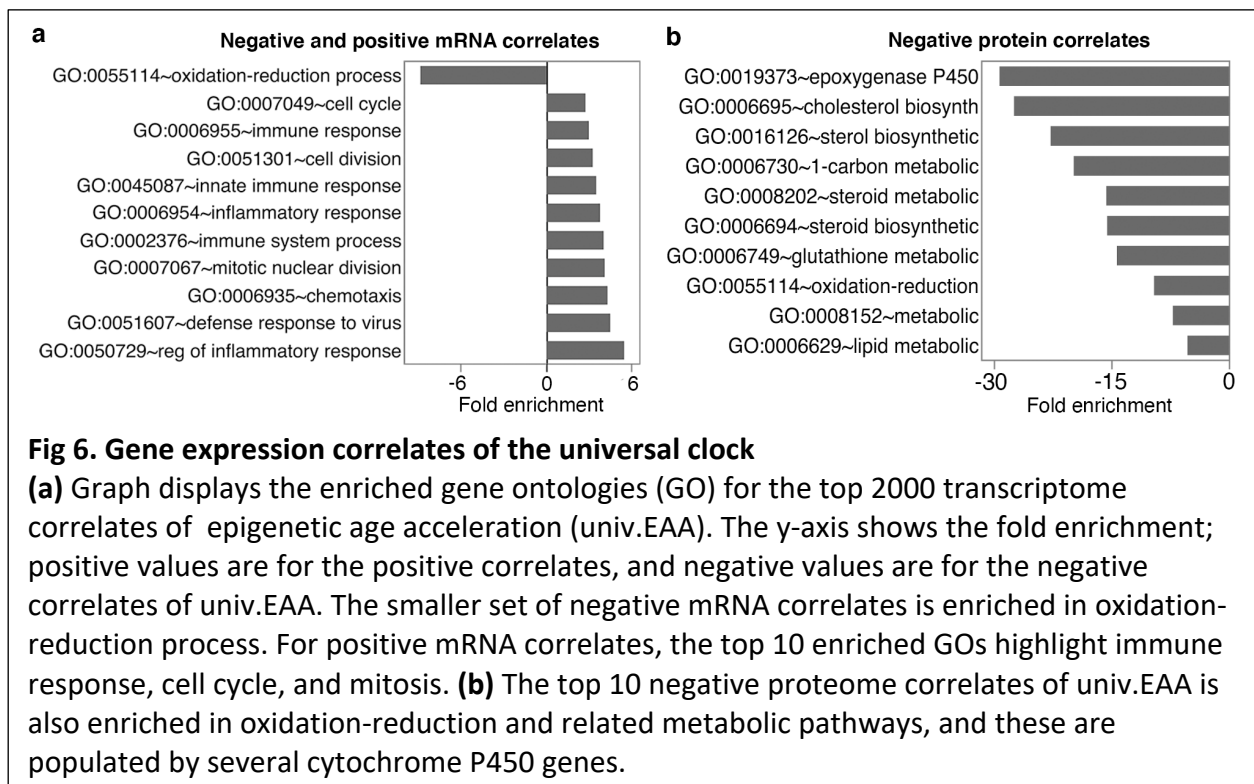

314 was not a liver-specific gene set (**Data S6**). Taking the top 10 GO categories, we can broadly  
315 discern two functional domains: immune and inflammatory response, and mitosis and cell cycle  
316 (**Fig 6a**). To verify that these associations are robust to the effect of diet, we repeated the  
317 correlation and enrichment analysis in the CD group only ( $n = 94$ ). Again, taking the top 2000  
318 correlates ( $|r| \leq 0.30$ ;  $p \leq 0.003$ ), we found the same enrichment profile for the positive and  
319 negative correlates (**Data S6**).

320 Next, we performed the correlational analysis using liver proteomic data that was available for  
321 164 of the BXDs. The proteome data quantifies over 32000 protein variants from only 3940  
322 unique genes<sup>19</sup>. We took the top 2000 protein correlates of univ.EAA ( $|r| \geq 0.27$ ,  $p \leq 6.0E-04$ )  
323 (**Data S7**). This represented protein levels from 563 unique genes. 1139 protein variants (215  
324 genes) had negative correlations, and similar to the mRNA correlates, there was enrichment in  
325 oxidation-reduction and metabolic processes. This set was also enriched in liver genes, and

326 included pathways related to lipid and steroid metabolism, epoxygenase p450 pathway, and  
327 xenobiotics (**Fig 6b; Data S8**). These categories were populated by the cytochrome genes  
328 including candidates in *Eaaq19* (e.g., *Cyp2c29*, *Cyp2c37*). The positive proteome correlates  
329 showed a different functional profile than the transcriptomic set. These were enriched in genes  
330 related to transport (includes apolipoprotein such as APOE), cell adhesion, protein translation,  
331 protein folding, and metabolic pathways related to glycolysis and gluconeogenesis (**Data S8**).

332 We performed a similar transcriptome and proteome analysis for the predicted-maxLS. For  
333 mRNA, both the negative and positive correlates were enriched in metabolic pathways  
334 including glucose and lipid metabolism (**Data S9, S10**). Similarly, the positive and negative  
335 protein correlates of predicted-maxLS converged on oxidation-reduction processes (included  
336 cytochrome genes located in proximal *Eaaq19*) and metabolic pathways (**Data S11, S12**).

## 337 Discussion

338 The goal of this study was to examine the aging methylome, its correlates and modifiers, and  
339 potential genetic drivers. HFD had a strong age-accelerating effect that concurs with the  
340 association between EAA and obesity in humans<sup>25,34,35</sup>. Age-acceleration due to diet manifested  
341 within the first 1 to 3 days of transitioning from normal lab chow to HFD. Even among the CD  
342 mice, higher weight gain at a younger age was associated with an accelerated clock.

343 Somewhat surprising was how entropy related to the metabolic traits. Epigenetic entropy  
344 increases with age, and is likely an indicator of the level of stochastic noise that increases with  
345 time<sup>7,36</sup>. In biological systems, entropy is kept at bay by the uptake of energy, and investment in  
346 maintenance and repair<sup>37</sup>. As HFD increased entropy (possibly due to higher cellular  
347 heterogeneity and adiposity of liver tissue), we expected entropy to be higher with higher body  
348 weight. But instead, entropy had an inverse correlation with weight, an effect that was  
349 primarily in the CD mice. Higher levels of serum glucose and total cholesterol were also  
350 associated with lower entropy. The reason for this is unclear, and we can only speculate that  
351 the enhanced energy consumption in mice that had higher metabolic substrates may have kept  
352 the methylome in a more ordered state. Despite this, mice with higher entropy also tended to  
353 have higher EAA. Entropy had a modest negative correlation with not only the DNAm based  
354 predicted-maxLS, but also with the known strain-level maxLS. The predicted-maxLS on the  
355 other hand, showed no direct association with diet or body weight, but higher total cholesterol  
356 and EAA predicted shorter predicted-maxLS.

357 For the BXDs, life expectancy is highly dependent on the background genotype<sup>18,22,24</sup>. Similarly,  
358 the universal and interventional clocks were more accelerated in mice belonging to strains with  
359 shorter lifespan, and the predicted-maxLS also concurred with the observed strain maxLS. We  
360 note that the predicted-maxLS overestimated the strain max-LS by 0.7 to 3 years (median error  
361 of +1.6 years). Nonetheless, the correlation between individual-level predicted-, and strain-level  
362 observed maxLS is remarkable considering that both the universal clock and max-LS predictor  
363 are pan-mammalian, and species- and tissue-agnostic<sup>17,38</sup>. Our results suggest that these  
364 universal epigenetic predictors of biological aging, and lifespan are informative of the subtle  
365 and normative lifespan variation in a family of inbred mice. The analysis between the epigenetic  
366 readouts and lifespan was also an indirect comparison. Unlike the comparison with body weight

367 and metabolic traits, which were traits measured from the same individual, the lifespan data  
368 are strain characteristics computed from a parallel cohort of mice that were allowed to survive  
369 till natural mortality. Nonetheless, this indirect comparison demonstrates that these epigenetic  
370 predictors capture genotype-dependent effects.

371 We tested different versions of the mouse DNAmAge clocks, and these appeared to capture  
372 slightly different aspects of epigenetic aging. For instance, the interventional clocks were  
373 sensitive to diet and early weight change, but not related to BW0 in the CD mice. Instead, BW0  
374 had a significant accelerating effect on the liver specific developmental clock (dev.EAA).

375 Our goal was to take these different clocks and identify regulatory loci that were the most  
376 stable and robust to the slight algorithmic differences in building the clocks. A notable  
377 candidate in *Eaaq11* is Syntaxin binding protein 4 (*Stxbp4*, aka, *Synip*), located at 90.5 Mb.  
378 *Stxbp4* is a high-priority candidate due to the concordant evidence from human genetic studies.  
379 The conserved gene in humans is a replicated GWAS hit for the intrinsic rate of epigenetic  
380 aging<sup>26-28</sup>. In the BXDs, *Stxbp4* contains several non-coding variants, and a missense mutation  
381 (rs3668623), and the expression of *Stxbp4* in liver is modulated by a *cis*-eQTL. *Stxbp4* plays a  
382 key role in insulin signaling<sup>39</sup>, and has oncogenic activity and implicated in different cancers<sup>40,41</sup>.  
383 Furthermore, GWAS have also associated *STXBP4* with age of menarche<sup>42,43</sup>. *Eaaq11*  
384 corresponds to the 17q12-21 region in humans, and the location of additional oncogenic genes,  
385 e.g., *ERBB2/HER2*, *GRB7*, and *BRCA1*<sup>44</sup>. The mouse *Brca1* gene is a little distal to the peak QTL  
386 region and is not considered a candidate here, although it does segregate for two missense  
387 variants in the BXDs. *Erb2* and *Grb7* are in the QTL region, and *Erb2* contains a missense  
388 variant (rs29390172), and *Grb7* is modulated by a *cis*-eQTL. *Nr1d1* is another candidate in  
389 *Eaaq11*, and the co-activation of *Erb2*, *Grb7*, and *Nr1d1* has been linked to breast and other  
390 cancers<sup>45,46</sup>.

391 *Eaaq19* was consistently associated with EAA from all the clocks we evaluated, and also with  
392 body weight gains, irrespective of diet. The predicted-maxLS also maps to this region, and  
393 DNAm entropy may also have a weak association with markers at this interval. The EAA traits  
394 have peak markers in the proximal part of *Eaaq19* (around the cytochrome cluster), and the  
395 predicted-maxLS peaks in the distal portion (over candidates like *Elov3*, *Pcgf3*). Two candidates  
396 in *Eaaq19* have been implicated in epigenetic aging in humans based on gene-level meta-  
397 GWAS: NK homeobox 3 (*Nkx2-3*, a developmental gene), and CutC copper transporter (*Cutc*)<sup>28</sup>.  
398 *Eaaq19* is also the location of the *Cyp26a1-Myof* genes, and the human syntenic region is  
399 associated with longevity, metabolic traits, and lipid profiles<sup>30,47,48</sup>. Another noteworthy  
400 candidate in *Eaaq19* is *Chuk*, a regulator of mTORC2, that has been associated with age at  
401 menopause<sup>42,49</sup>. Clearly, *Eaaq19* presents a complex and intriguing QTL related to the different  
402 DNAm readouts, and potentially metabolic traits. Both *Eaaq19* and *Eaaq11* exemplify the major  
403 challenge that follows when a genetic mapping approach leads to gene- and variant-dense  
404 regions<sup>50,51</sup>. Both loci have several biologically relevant genes, and identifying the causal gene  
405 (or genes) will require a more fine-scaled functional genomic dissection.

406 The gene expression analyses highlighted metabolic pathways related to lipids, glucose, and  
407 proteins for both the univ.EAA and predicted-maxLS. Other enriched pathways were mitosis  
408 and cell division, and immune processes, but this was specific to the positive transcriptomic



409 correlates. The more compelling evidence is for the cytochrome P450 genes, which are both  
410 positional candidates, as well as expression correlates at the transcriptomic and proteomic  
411 levels. These genes have high expression in liver, and have major downstream impact on  
412 metabolism<sup>52-54</sup>. One caveat is that these CYP genes are part of a gene cluster in *Eaaq19* that  
413 includes transcripts with *cis*-eQTLs (e.g., *Cyp2c66*, *Cyp2c39*, *Cyp2c68*), and the tight clustering of  
414 the genes, and proximity of trait QTL and eQTLs may result in tight co-expression due to linkage  
415 disequilibrium<sup>55</sup>. Nonetheless, the cytochrome genes in *Eaaq19* are strong candidate  
416 modulators of EAA that calls for further investigation.

417 Aside from *Eaaq11* and *Eaaq19*, loci with evidence of consensus QTLs were also detected on  
418 Chrs 1 and 3. We do not delve into these in the present work, but the Chr3 interval is near  
419 genes associated with human epigenetic aging (*Ift80*, *Trim59*, *Kpna4*)<sup>26,28</sup>. However, this QTL is  
420 dispersed across a large interval, and the peak markers do not exactly overlap these human EAA  
421 GWAS hits. While we have focused on *Eaaq11* and *Eaaq19*, these other loci also present  
422 potentially important regions for EAA.

423 In summary, we have identified two main QTLs—*Eaaq11* and *Eaaq19*—that contribute to  
424 variation in two DNAm readouts: EAA, and predicted-maxLS. *Eaaq11* contains several genes  
425 with oncogenic properties (e.g., *Stxbp4*, *Erbp2*), while *Eaaq19* contains a dense cluster of  
426 metabolic genes (e.g., *Elovl3*, *Chuk*, the cytochrome genes). We demonstrate that metabolic  
427 profile and body weight are closely related to epigenetic aging. The convergence of evidence  
428 from genetic and gene expression analyses suggests that genes involved in metabolism and  
429 energy balance may modulate the age-dependent restructuring of the methylome, and this  
430 may in turn, have an impact on the epigenetic predictors of aging and lifespan.

## 431 **Materials and Methods**

### 432 **Biospecimen collection and processing**

433 Samples for this study were selected from a larger colony of BXD mice that were housed in a  
434 specific pathogen-free (SPF) facility at the University of Tennessee Health Science Center  
435 (UTHSC). All animal procedures were in accordance with a protocol approved by the  
436 Institutional Animal Care and Use Committee (IACUC) at the UTHSC. Detailed description of  
437 housing conditions and diet can be found in<sup>18,19</sup>. Mice were given *ad libitum* access to water,  
438 and either standard laboratory chow (Harlan Teklad; 2018, 18.6% protein, 6.2% fat, 75.2%  
439 carbohydrates), or high-fat chow (Harlan Teklad 06414; 18.4% protein, 60.3% fat, 21.3%  
440 carbohydrate). Animals were first weighed within the first few days of assignment to either  
441 diets, and this was mostly but not always prior to introduction to HFD. Following this, animals  
442 were weighed periodically, and a final time (BWF) when animals were humanely euthanized  
443 (anesthetized with avertin at 0.02 ml per g of weight, followed by perfusion with phosphate-  
444 buffered saline) at specific ages for tissue collection. The present work utilizes the biobanked  
445 liver specimens that were pulverized and stored in -80 °C, and overlaps samples described in<sup>19</sup>.  
446 DNA was extracted using the DNeasy Blood & Tissue Kit from Qiagen. Nucleic acid purity was  
447 inspected with a NanoDrop spectrophotometer, and quantified using a Qubit fluorometer  
448 dsDNA BR Assay.

### 449 **Methylation array, quality check, and entropy calculation**

450 DNA samples from ~350 BXD mice were profiled on the Illumina HorvathHumanMethylChip40  
451 array. Details of this array are described here<sup>15</sup>. The array contains probes that target ~36K  
452 highly conserved CpGs in mammals. Over 33K probes map to homologous regions in the mouse  
453 genome, and data from these were normalized using the SeSama method<sup>56</sup>. Unsupervised  
454 hierarchical clustering was performed to identify outliers and failed arrays, and these were  
455 excluded. We also performed strain verification as an additional quality check. While majority  
456 of the probes were free of DNA sequence variants, we found 45 probes that overlapped  
457 variants in the BXD family. We leveraged these as proxies for genotypes, and performed a  
458 principal component analysis. The top principal component (PC1 and PC2) segregated the  
459 samples by strain identity, and samples that did not cluster with the reported strains were  
460 removed. After excluding outliers, failed arrays, and samples that failed strain verification, the  
461 final liver DNAm data consisted of 339 samples.

462 For entropy calculation, we used 27966 probes that have been validated for the mouse genome  
463 using calibration data generated from synthetic mouse DNA<sup>57</sup>. Shannon entropy was calculated  
464 for each sample using the R package, “entropy” (v1.2.1) with method = “ML”: maximum  
465 likelihood<sup>58</sup>.

## 466 **Clock estimation and maximum lifespan predictor**

467 The development of the universal pan-tissue epigenetic clocks of age, and the universal  
468 maximum lifespan predictor are described in Lu et al<sup>38</sup>, and Li et al.<sup>17</sup>, respectively. For the  
469 present work, we utilized the universal clock that predicts relative age, defined as individual age  
470 relative to the maximum lifespan of its species, followed by inverse transformation to estimate  
471 DNAmAge<sup>38</sup>. The mouse specific clock were built using subsets of CpGs, and these will be  
472 described in a companion paper. Age acceleration (EAA) measures were defined as the  
473 residuals from regression of DNAm age on chronological age. By definition, EAA measures are  
474 independent of age.

## 475 **Statistics**

476 Statistical analyses between the epigenetic predictors and continuous variables (body weight,  
477 strain lifespan) were based on Pearson correlations, and t-test was used to evaluate the effect  
478 of categorical predictors (sex, diet).

479 Two metabolic traits were downloaded from the bioinformatics platform GeneNetwork 2 (GN2)  
480<sup>59</sup>: (1) fasted serum glucose, and (2) fasted serum total cholesterol (more information on how  
481 to retrieve these data directly from GN2 are provided in **Data S13**). Association with metabolic  
482 traits was examined using multivariable linear regression (the R equations are provided in **Table**  
483 **S1**). For visualization, residuals for both the predictor and outcome variables were extracted  
484 after regressing on age, diet, and BWF using the R code: residuals(lm( ~ age + diet + BWF)).

485 Longevity data (defined as age at natural death) was also downloaded from GN2 (**Data S13**)<sup>18</sup>.  
486 Males were excluded and strain-by-diet lifespan summary statistics were derived. Only strain-  
487 by-diet groups with 5 or more observations were included in the correlational analyses with the  
488 epigenetic predictors.

## 489 **Genetic analyses**

490 The broad sense heritability within diet was estimated as the fraction of variability that was  
491 explained by background genotype<sup>20,60,61</sup>. For this, we applied a simple anova:  $\text{aov}(\text{EAA} \sim$   
492  $\text{strain})$ , and heritability was computed as  $H^2 = \text{SSq}_{\text{strain}} / (\text{SSq}_{\text{strain}} + \text{SSq}_{\text{residual}})$ , where  $\text{SSq}_{\text{strain}}$  is the  
493 strain sum of squares, and  $\text{SSq}_{\text{residual}}$  is the residual sum of squares.

494 All QTL mapping was done on the GN2 platform, and these traits can be accessed from this  
495 website<sup>59</sup> (trait accession IDs provided in **Data S13**). In the GN2 home page, the present set of  
496 BXD mice belongs to the **Group: BXD NIA Longevity Study**, and GN2 provides a direct interface  
497 to the genotype data. All QTL mapping was done for genotypes with minor allele frequency  $\geq$   
498 0.05 using the genome-wide efficient mixed model association (GEMMA) algorithm<sup>31</sup>, which  
499 corrects for the BXD kinship matrix. For the EAA traits, diet, weight at 6 months, and final  
500 weight were fitted as cofactor. Chronological age had not correlation with EAA and this was not  
501 included as a cofactor (including age does not change the results). Genome-wide linkage  
502 statistics were downloaded for the full set of markers that were available from GN2 (3720  
503 markers as of early 2021). For the combined p-values, QTL mapping was done separately using  
504 GEMMA for each EAA derived from all the unbiased mouse and universal clocks. Fisher's p-  
505 value combination was then applied to get the meta-p-value<sup>32</sup>. We used this method to simply  
506 highlight loci that had consistent linkage across the different EAA measures. QTL mapping for  
507 entropy, major covariates—age, diet, BW1, and BWF—were included as co-factors. QTL  
508 mapping for predicted-maxLS was done without co-factors as age, weight, and diet were not  
509 significant covariates (including these do not change the results).

510 For marker specific linkage, we selected SNPs located at the peak QTL regions (DA0014408,  
511 rs48062674, rs30567369), and grouped the BXDs by their genotypes (F1 hybrids and other  
512 heterozygotes were excluded from this), and marker specific linkage was tested using ANOVA.  
513 rs48062674 and rs30567369 are reference variants that is already catalogued in dbSNP<sup>62</sup>, and is  
514 used as a marker in the QTL mapping. DA0014408.4 is an updated variant at a recombinant  
515 region in the Chr11 interval and within the peak QTL interval<sup>20</sup>. Genotypes at these markers for  
516 individual BXD samples are in **Data S1**.

517 For marker specific QTL analysis for EAA, we performed linear regression using the data in **Data**  
518 **S1**. Heterozygotes at the respective markers were excluded, and we applied the following  
519 regression model for each of the unbiased mouse and universal EAA separately:  $\text{lm}(\text{EAA} \sim$   
520  $\text{genotype} + \text{diet})$ . To test the effect on body weight change, body weight data measured at  
521 approximately 4 (baseline), 6, 12, 18, and 24 months were downloaded from GN2 (**Data S13**).  
522 Detailed description of these weight data are in Roy et al<sup>18</sup>. We then applied a mixed effects  
523 regression model using the lme4 R package<sup>63</sup>:  $\text{lmer}(\text{weight} \sim \text{age} + \text{diet} + \text{genotype} + (1 | \text{ID}))$ ,  
524 where ID is the identifier for individual mouse.

## 525 **Bioinformatic tools for candidate gene selection**

526 Sequence variation between B6 and D2 in the QTL intervals (Chr11:90–99 Mb, and Chr19:35–48  
527 Mb) were retrieved from the Wellcome Sanger Institute Mouse Genomes Project database  
528 (release 1505 for GRCm38/mm10)<sup>64-66</sup>. Positional candidates were required to contain at least  
529 one coding variant (missense and/or nonsense variants), or have non-coding variants with  
530 evidence of *cis*-regulation in liver tissue of the BXDs. *Cis*-eQTLs for the candidate genes were  
531 obtained from the liver RNA-seq data described in<sup>19</sup>. An interface to search and analyze this

532 transcriptome data is available from GN2, and is catalogued under *Group: BXD NIA Longevity*  
533 *Study; Type: Liver mRNA; and Dataset: UTHSC BXD Liver RNA-seq (Oct 19) TMP Log2*. This data  
534 was also used for the transcriptome-wide correlations analysis for univ.EAA in the 153 cases  
535 that had both DNAm and RNA-seq data. We considered the top 2000 highest correlated  
536 transcripts, and the list of transcripts were collapsed to a non-redundant list of gene symbols,  
537 and this was uploaded to the DAVID Bioinformatics Database (version 6.8) for GO enrichment  
538 analysis<sup>67,68</sup>. Similarly, proteome correlational analysis was carried out using the data: *Group:*  
539 *BXD NIA Longevity Study; Type: Liver Proteome; and Dataset: EPFL/ETHZ BXD Liver Proteome*  
540 *CD-HFD (Nov19)*<sup>19</sup>.

541 For human GWAS annotations, we navigated to the corresponding syntenic regions on the  
542 human genome by using the coordinate conversion tool in the UCSC Genome Browser. The  
543 Chr11 90–95 Mb interval on the mouse reference genome (GRCm38/mm10) corresponds to  
544 human Chr17:50.14–55.75 Mb (GRCh38/hg38) (40.7% of bases; 100% span). The Chr11 95–99  
545 Mb interval in the mouse corresponds to human Chr17:47.49–50.14 Mb (29.3% of bases, 57.9%  
546 span), and Chr17:38.19–40.39 Mb (20.7% of bases, 44.1% span). Likewise, for the Chr19 QTL,  
547 the mm10 35–40 Mb corresponds to hg38 Chr10:89.80–95.06 Mb (32.2% of bases, 89.2% span),  
548 40–45 Mb corresponds to hg38 Chr10:95.23–100.98 Mb (46.6% of bases, 95.6% span), and 45–  
549 48 Mb corresponds to hg38 Chr10:100.98–104.41 Mb (46.5% of bases, 100% span). We then  
550 downloaded the GWAS data for these regions from the NHGRI-EBI GWAS catalogue<sup>33</sup>, and  
551 retained the GWAS hits that were related to aging.

## 552 **Data availability**

553 The full microarray data will be released via NCBI's Gene Expression Omnibus upon official  
554 publication. Genome annotations of the CpGs can be found on Github  
555 <https://github.com/shorvath/MammalianMethylationConsortium>. Individual level BXD data are  
556 available on [www.genenetwork.org](http://www.genenetwork.org) on FAIR+ compliant format; data identifiers, and way to  
557 retrieve data are described in **Data S13**.

558 **Acknowledgement.** We thank the entire UTHSC BXD Aging Colony team, particularly  
559 Casey J Chapman, Melinda S McCarty, Jesse Ingles, and everyone else who contributed to the  
560 tissue harvest. We thank Evan G Williams for making the gene expression data readily available,  
561 and to David Ashbrook for providing the BXD genotypes. We thank the GeneNetwork team,  
562 especially Zach Sloan and Arthur Centeno, who have been extremely prompt and effective at  
563 assisting with the GeneNetwork interface.

564 **Author contributions.** KM contributed to the data, conceived portion of the study, and  
565 performed statistical analysis and drafted the article. ATL, CZL, AH contributed to the data  
566 analysis and in computing the epigenetic clocks and predictor. JVS contributed to the lab work.  
567 RWW conceived of the BXD Aging Colony, and provided access to the BXD biospecimen and  
568 data. SH developed the array platform, and built the epigenetic clocks and predictor. All authors  
569 contributed to, and approved the manuscript.

570 **Research funding.** This study was funded by the NIH NIA grants R21AG055841 and  
571 R01AG043930

572 **Competing interests.** SH is a founder of the non-profit Epigenetic Clock Development  
573 Foundation, which plans to license several of his patents from his employer UC Regents. The  
574 other authors declare no conflicts of interest.

575 **Ethics approval.** All animal procedures were in accordance to protocol approved by the  
576 Institutional Animal Care and Use Committee (IACUC) at the University of Tennessee Health  
577 Science Center.

## 578 **Reference:**

- 579 1 Horvath, S. & Raj, K. DNA methylation-based biomarkers and the epigenetic clock theory  
580 of ageing. *Nature reviews. Genetics* **19**, 371-384, doi:10.1038/s41576-018-0004-3  
581 (2018).
- 582 2 Zannas, A. S. *et al.* Lifetime stress accelerates epigenetic aging in an urban, African  
583 American cohort: relevance of glucocorticoid signaling. *Genome biology* **16**, 266,  
584 doi:10.1186/s13059-015-0828-5 (2015).
- 585 3 Marioni, R. E. *et al.* The epigenetic clock is correlated with physical and cognitive fitness  
586 in the Lothian Birth Cohort 1936. *International journal of epidemiology* **44**, 1388-1396,  
587 doi:10.1093/ije/dyu277 (2015).
- 588 4 Dugue, P. A. *et al.* DNA methylation-based biological aging and cancer risk and survival:  
589 Pooled analysis of seven prospective studies. *Int J Cancer* **142**, 1611-1619,  
590 doi:10.1002/ijc.31189 (2018).
- 591 5 Lu, A. T. *et al.* DNA methylation GrimAge strongly predicts lifespan and healthspan.  
592 *Aging* **11**, 303-327, doi:10.18632/aging.101684 (2019).
- 593 6 Ryan, J., Wrigglesworth, J., Loong, J., Fransquet, P. D. & Woods, R. L. A systematic review  
594 and meta-analysis of environmental, lifestyle and health factors associated with DNA  
595 methylation age. *The journals of gerontology. Series A, Biological sciences and medical*  
596 *sciences*, doi:10.1093/gerona/glz099 (2019).
- 597 7 Hannum, G. *et al.* Genome-wide methylation profiles reveal quantitative views of  
598 human aging rates. *Molecular cell* **49**, 359-367, doi:10.1016/j.molcel.2012.10.016  
599 (2013).
- 600 8 Horvath, S. DNA methylation age of human tissues and cell types. *Genome biology* **14**,  
601 R115, doi:10.1186/gb-2013-14-10-r115 (2013).
- 602 9 Petkovich, D. A. *et al.* Using DNA Methylation Profiling to Evaluate Biological Age and  
603 Longevity Interventions. *Cell metabolism* **25**, 954-960 e956,  
604 doi:10.1016/j.cmet.2017.03.016 (2017).
- 605 10 Stubbs, T. M. *et al.* Multi-tissue DNA methylation age predictor in mouse. *Genome*  
606 *biology* **18**, 68, doi:10.1186/s13059-017-1203-5 (2017).
- 607 11 Wang, T. *et al.* Epigenetic aging signatures in mice livers are slowed by dwarfism, calorie  
608 restriction and rapamycin treatment. *Genome biology* **18**, 57, doi:10.1186/s13059-017-  
609 1186-2 (2017).
- 610 12 Horvath, S. *et al.* Epigenetic clock for skin and blood cells applied to Hutchinson Gilford  
611 Progeria Syndrome and ex vivo studies. *Aging* **10**, 1758-1775,  
612 doi:10.18632/aging.101508 (2018).

- 613 13 Levine, M. E. *et al.* An epigenetic biomarker of aging for lifespan and healthspan. *Aging*  
614 **10**, 573-591, doi:10.18632/aging.101414 (2018).
- 615 14 Shireby, G. L. *et al.* Recalibrating the epigenetic clock: implications for assessing  
616 biological age in the human cortex. *Brain* **143**, 3763-3775, doi:10.1093/brain/awaa334  
617 (2020).
- 618 15 Arneson, A. *et al.* A mammalian methylation array for profiling methylation levels at  
619 conserved sequences. *bioRxiv*, 2021.2001.2007.425637, doi:10.1101/2021.01.07.425637  
620 (2021).
- 621 16 Lu, A. T. *et al.* Universal DNA methylation age across mammalian tissues. *bioRxiv*,  
622 2021.2001.2018.426733, doi:10.1101/2021.01.18.426733 (2021).
- 623 17 Li, C. Z. *et al.* Epigenetic predictors of maximum lifespan and other life history traits in  
624 mammals. *bioRxiv*, 2021.2005.2016.444078, doi:10.1101/2021.05.16.444078 (2021).
- 625 18 Roy, S. *et al.* Gene-by-environmental modulation of longevity and weight gain in the  
626 murine BXD family. *bioRxiv*, 776559, doi:10.1101/776559 (2020).
- 627 19 Williams, E. G. *et al.* Multi-Omic Profiling of the Liver Across Diets and Age in a Diverse  
628 Mouse Population. *bioRxiv*, 2020.2008.2020.222968, doi:10.1101/2020.08.20.222968  
629 (2020).
- 630 20 Ashbrook, D. G. *et al.* A Platform for Experimental Precision Medicine: The Extended  
631 BXD Mouse Family. *Cell Syst*, doi:10.1016/j.cels.2020.12.002 (2021).
- 632 21 Peirce, J. L., Lu, L., Gu, J., Silver, L. M. & Williams, R. W. A new set of BXD recombinant  
633 inbred lines from advanced intercross populations in mice. *BMC genetics* **5**, 7,  
634 doi:10.1186/1471-2156-5-7 (2004).
- 635 22 de Haan, G. & Williams, R. W. A genetic and genomic approach to identify longevity  
636 genes in mice. *Mechanisms of ageing and development* **126**, 133-138,  
637 doi:10.1016/j.mad.2004.09.012 (2005).
- 638 23 Hsu, H. C. *et al.* Age-related thymic involution in C57BL/6J x DBA/2J recombinant-inbred  
639 mice maps to mouse chromosomes 9 and 10. *Genes and immunity* **4**, 402-410,  
640 doi:10.1038/sj.gene.6363982 (2003).
- 641 24 Lang, D. H. *et al.* Quantitative trait loci (QTL) analysis of longevity in C57BL/6J by DBA/2J  
642 (BXD) recombinant inbred mice. *Aging clinical and experimental research* **22**, 8-19  
643 (2010).
- 644 25 Sandoval-Sierra, J. V. *et al.* Body weight and high-fat diet are associated with epigenetic  
645 aging in female members of the BXD murine family. *Aging cell*, e13207,  
646 doi:10.1111/accel.13207 (2020).
- 647 26 Gibson, J. *et al.* A meta-analysis of genome-wide association studies of epigenetic age  
648 acceleration. *PLoS genetics* **15**, e1008104, doi:10.1371/journal.pgen.1008104 (2019).
- 649 27 Lu, A. T. *et al.* GWAS of epigenetic aging rates in blood reveals a critical role for TERT.  
650 *Nature communications* **9**, 387, doi:10.1038/s41467-017-02697-5 (2018).
- 651 28 McCartney, D. L. *et al.* Genome-wide association studies identify 137 loci for DNA  
652 methylation biomarkers of ageing. *bioRxiv*, 2020.2006.2029.133702,  
653 doi:10.1101/2020.06.29.133702 (2020).
- 654 29 Benton, M. C. *et al.* Methylome-wide association study of whole blood DNA in the  
655 Norfolk Island isolate identifies robust loci associated with age. *Aging* **9**, 753-768,  
656 doi:10.18632/aging.101187 (2017).

- 657 30 Yashin, A. I. *et al.* Genetics of Human Longevity From Incomplete Data: New Findings  
658 From the Long Life Family Study. *The journals of gerontology. Series A, Biological*  
659 *sciences and medical sciences* **73**, 1472-1481, doi:10.1093/gerona/gly057 (2018).
- 660 31 Zhou, X. & Stephens, M. Efficient multivariate linear mixed model algorithms for  
661 genome-wide association studies. *Nature methods* **11**, 407-409,  
662 doi:10.1038/nmeth.2848 (2014).
- 663 32 Peirce, J. L., Broman, K. W., Lu, L. & Williams, R. W. A simple method for combining  
664 genetic mapping data from multiple crosses and experimental designs. *PloS one* **2**,  
665 e1036, doi:10.1371/journal.pone.0001036 (2007).
- 666 33 Catalog, G. <<https://www.ebi.ac.uk/gwas/>> (  
667 34 Horvath, S. *et al.* Obesity accelerates epigenetic aging of human liver. *Proceedings of the*  
668 *National Academy of Sciences of the United States of America* **111**, 15538-15543,  
669 doi:10.1073/pnas.1412759111 (2014).
- 670 35 Nevalainen, T. *et al.* Obesity accelerates epigenetic aging in middle-aged but not in  
671 elderly individuals. *Clinical epigenetics* **9**, 20, doi:10.1186/s13148-016-0301-7 (2017).
- 672 36 Xie, H. *et al.* Genome-wide quantitative assessment of variation in DNA methylation  
673 patterns. *Nucleic acids research* **39**, 4099-4108, doi:10.1093/nar/gkr017 (2011).
- 674 37 Hayflick, L. Entropy explains aging, genetic determinism explains longevity, and  
675 undefined terminology explains misunderstanding both. *PLoS genetics* **3**, e220,  
676 doi:10.1371/journal.pgen.0030220 (2007).
- 677 38 Lu, A. T. *et al.* Universal DNA methylation age across mammalian tissues. *bioRxiv*,  
678 2021.2001.2018.426733, doi:10.1101/2021.01.18.426733 (2021).
- 679 39 Holman, G. D. A new deadly Syn? *Curr Biol* **9**, R735-737, doi:10.1016/s0960-  
680 9822(99)80471-0 (1999).
- 681 40 Michailidou, K. *et al.* Association analysis identifies 65 new breast cancer risk loci.  
682 *Nature* **551**, 92-94, doi:10.1038/nature24284 (2017).
- 683 41 Rokudai, S. *et al.* STXBP4 regulates APC/C-mediated p63 turnover and drives squamous  
684 cell carcinogenesis. *Proceedings of the National Academy of Sciences of the United*  
685 *States of America* **115**, E4806-E4814, doi:10.1073/pnas.1718546115 (2018).
- 686 42 Kichaev, G. *et al.* Leveraging Polygenic Functional Enrichment to Improve GWAS Power.  
687 *American journal of human genetics* **104**, 65-75, doi:10.1016/j.ajhg.2018.11.008 (2019).
- 688 43 Perry, J. R. *et al.* Parent-of-origin-specific allelic associations among 106 genomic loci for  
689 age at menarche. *Nature* **514**, 92-97, doi:10.1038/nature13545 (2014).
- 690 44 Albertsen, H. M. *et al.* A physical map and candidate genes in the BRCA1 region on  
691 chromosome 17q12-21. *Nature genetics* **7**, 472-479, doi:10.1038/ng0894-472 (1994).
- 692 45 Kauraniemi, P. & Kallioniemi, A. Activation of multiple cancer-associated genes at the  
693 ERBB2 amplicon in breast cancer. *Endocr Relat Cancer* **13**, 39-49,  
694 doi:10.1677/erc.1.01147 (2006).
- 695 46 Tanaka, S. *et al.* Coexpression of Grb7 with epidermal growth factor receptor or  
696 Her2/erbB2 in human advanced esophageal carcinoma. *Cancer research* **57**, 28-31  
697 (1997).
- 698 47 de Vries, P. S. *et al.* Multiancestry Genome-Wide Association Study of Lipid Levels  
699 Incorporating Gene-Alcohol Interactions. *Am J Epidemiol* **188**, 1033-1054,  
700 doi:10.1093/aje/kwz005 (2019).

- 701 48 Richardson, T. G. *et al.* Evaluating the relationship between circulating lipoprotein lipids  
702 and apolipoproteins with risk of coronary heart disease: A multivariable Mendelian  
703 randomisation analysis. *PLoS Med* **17**, e1003062, doi:10.1371/journal.pmed.1003062  
704 (2020).
- 705 49 Xu, Y. *et al.* IKK interacts with rictor and regulates mTORC2. *Cell Signal* **25**, 2239-2245,  
706 doi:10.1016/j.cellsig.2013.07.008 (2013).
- 707 50 Gallagher, M. D. & Chen-Plotkin, A. S. The Post-GWAS Era: From Association to Function.  
708 *American journal of human genetics* **102**, 717-730, doi:10.1016/j.ajhg.2018.04.002  
709 (2018).
- 710 51 Lappalainen, T. Functional genomics bridges the gap between quantitative genetics and  
711 molecular biology. *Genome research* **25**, 1427-1431, doi:10.1101/gr.190983.115 (2015).
- 712 52 Olona, A. *et al.* Epoxygenase inactivation exacerbates diet and aging-associated  
713 metabolic dysfunction resulting from impaired adipogenesis. *Mol Metab* **11**, 18-32,  
714 doi:10.1016/j.molmet.2018.03.003 (2018).
- 715 53 Schuck, R. N. *et al.* The cytochrome P450 epoxygenase pathway regulates the hepatic  
716 inflammatory response in fatty liver disease. *PLoS one* **9**, e110162,  
717 doi:10.1371/journal.pone.0110162 (2014).
- 718 54 Wang, Q. *et al.* Time serial transcriptome reveals Cyp2c29 as a key gene in  
719 hepatocellular carcinoma development. *Cancer Biol Med* **17**, 401-417,  
720 doi:10.20892/j.issn.2095-3941.2019.0335 (2020).
- 721 55 Mozhui, K. *et al.* Dissection of a QTL hotspot on mouse distal chromosome 1 that  
722 modulates neurobehavioral phenotypes and gene expression. *PLoS genetics* **4**,  
723 e1000260, doi:10.1371/journal.pgen.1000260 (2008).
- 724 56 Zhou, W., Triche, T. J., Jr., Laird, P. W. & Shen, H. SeSAMe: reducing artifactual detection  
725 of DNA methylation by Infinium BeadChips in genomic deletions. *Nucleic acids research*  
726 **46**, e123, doi:10.1093/nar/gky691 (2018).
- 727 57 Haghani, A. *et al.* DNA Methylation Networks Underlying Mammalian Traits. *bioRxiv*,  
728 2021.2003.2016.435708, doi:10.1101/2021.03.16.435708 (2021).
- 729 58 Hausser, J. & Strimmer, K. Entropy Inference and the James-Stein Estimator, with  
730 Application to Nonlinear Gene Association Networks. *J. Mach. Learn. Res.* **10**, 1469–  
731 1484 (2009).
- 732 59 *GeneNetwork 2*, <<http://genenetwork.org>> (  
733 60 Ashbrook, D. G. *et al.* Born to Cry: A Genetic Dissection of Infant Vocalization. *Front*  
734 *Behav Neurosci* **12**, 250, doi:10.3389/fnbeh.2018.00250 (2018).
- 735 61 Belknap, J. K. Effect of within-strain sample size on QTL detection and mapping using  
736 recombinant inbred mouse strains. *Behavior genetics* **28**, 29-38 (1998).
- 737 62 Sherry, S. T. *et al.* dbSNP: the NCBI database of genetic variation. *Nucleic acids research*  
738 **29**, 308-311, doi:10.1093/nar/29.1.308 (2001).
- 739 63 Bates, D., Maechler, M., Bolker, B. & Walker, S. lme4: Linear mixed-effects models using  
740 Eigen and S4. . *R package version 1.1-7*, <http://CRAN.R-project.org/package=lme4>.  
741 64 *Wellcome Sanger Institute Mouse Genome Project*,  
742 <[https://www.sanger.ac.uk/sanger/Mouse\\_SnpViewer/rel-1505](https://www.sanger.ac.uk/sanger/Mouse_SnpViewer/rel-1505)> (  
743 65 Keane, T. M. *et al.* Mouse genomic variation and its effect on phenotypes and gene  
744 regulation. *Nature* **477**, 289-294, doi:10.1038/nature10413 (2011).



745 66 Yalcin, B. *et al.* Sequence-based characterization of structural variation in the mouse  
746 genome. *Nature* **477**, 326-329, doi:10.1038/nature10432 (2011).  
747 67 Huang da, W., Sherman, B. T. & Lempicki, R. A. Bioinformatics enrichment tools: paths  
748 toward the comprehensive functional analysis of large gene lists. *Nucleic acids research*  
749 **37**, 1-13, doi:10.1093/nar/gkn923 (2009).  
750 68 Huang da, W., Sherman, B. T. & Lempicki, R. A. Systematic and integrative analysis of  
751 large gene lists using DAVID bioinformatics resources. *Nature protocols* **4**, 44-57,  
752 doi:10.1038/nprot.2008.211 (2009).  
753

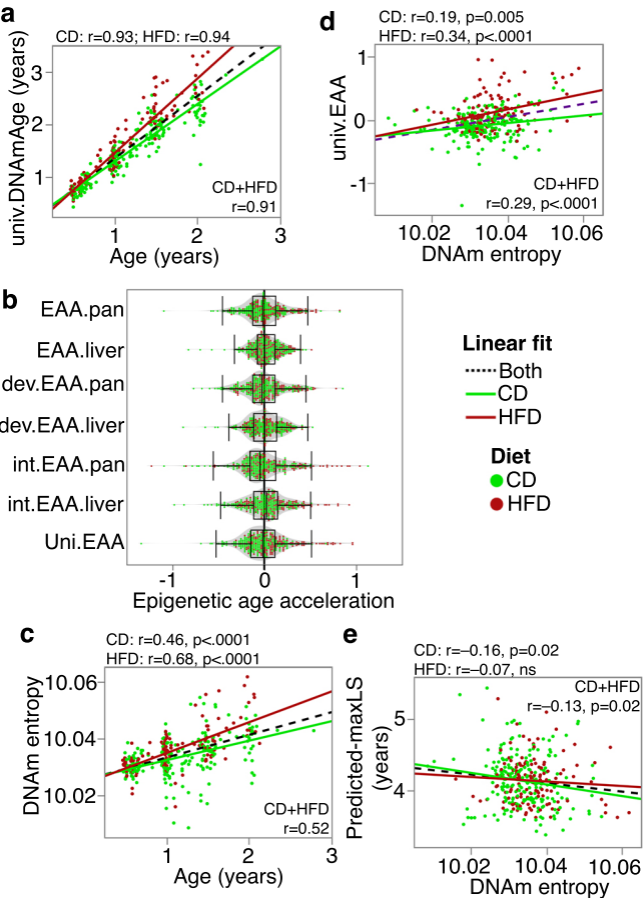

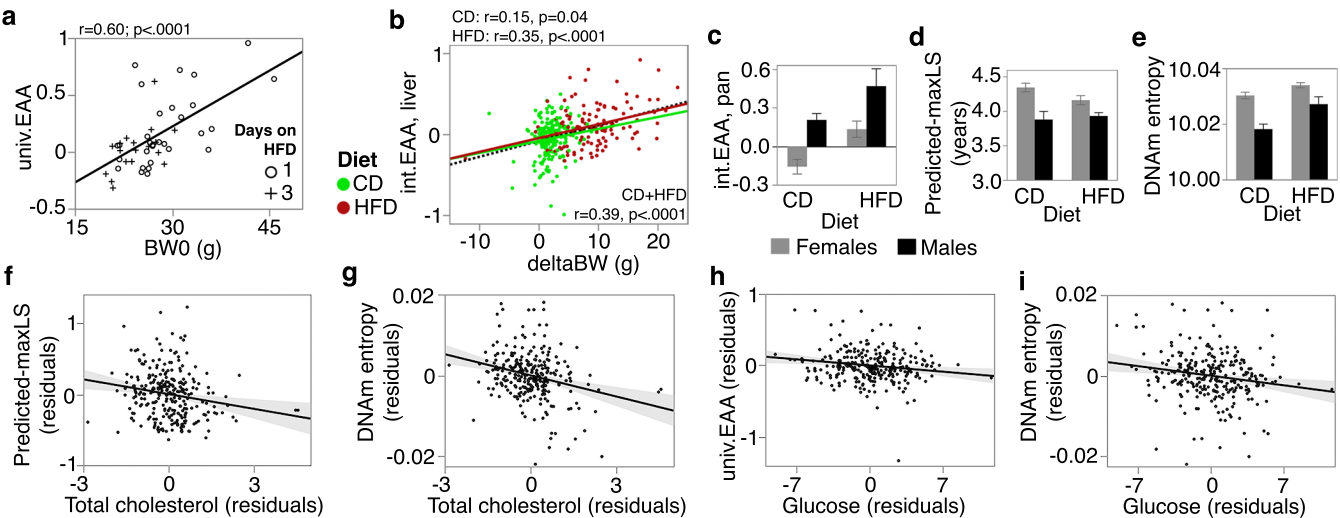

**a** Strain LS (25Q, years)

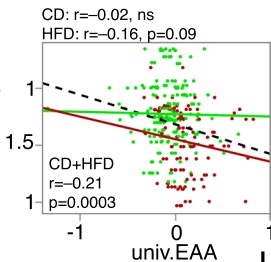

**Linear fit**

..... Both

— CD

— HFD

**Diet**

● CD

● HFD

**b** Strain LS (75Q, years)

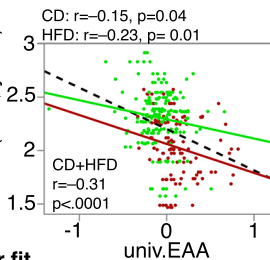

**c**

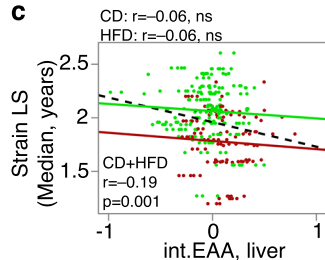

**d** Strain LS (max, years)

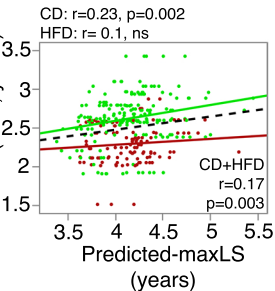

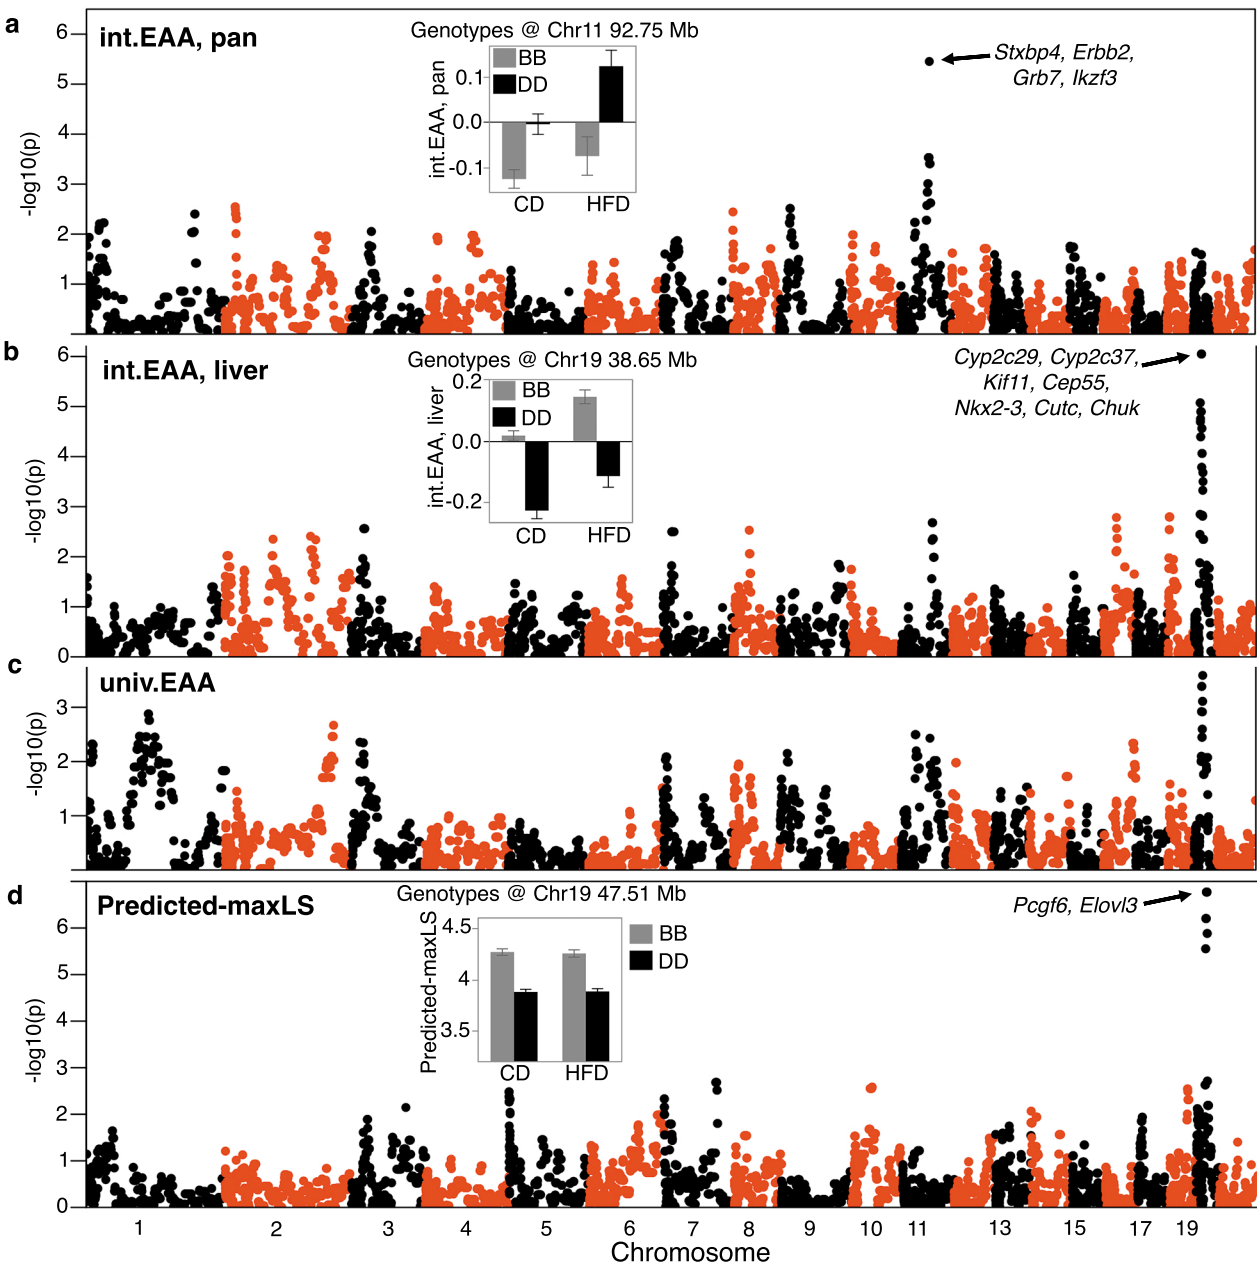

**a***Leaaq11*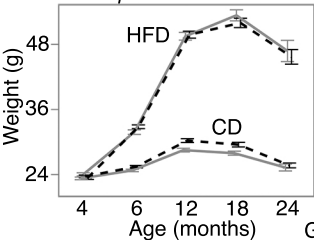**b***Leaaq19*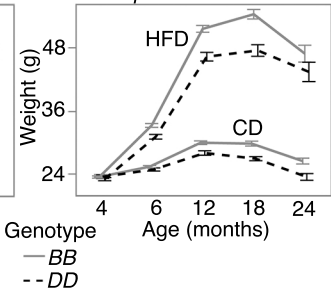

**a****Negative and positive mRNA correlates**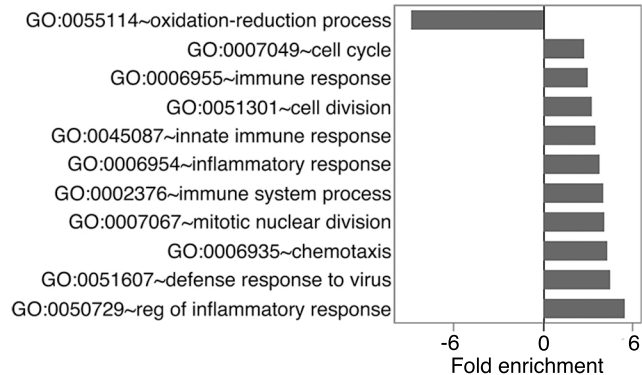**b****Negative protein correlates**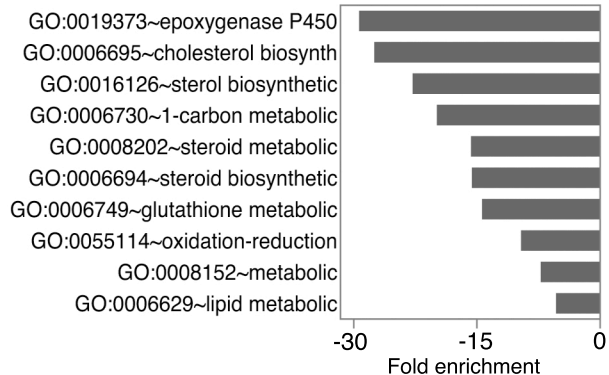

Source: https://www.biorxiv.org/content/10.1101/2021.06.23.449634v1.full.pdf
